# Supplementary material for: Application of MOX Sensors to Determine the Emission of Volatile Compounds in Corn Groats as a Function of Vertical Pressure in the Silo and Moisture Content of the Bed
Source: MDPI journal article supplement (doi:10.3390/s24072187), 2024-03-28
Supplement: s1 [file s1]

## 01\_Supplementary Materials.

### Electronic nose procedure

Agrinose (Food Volatile Compound Analyser) has been designed and built in the Institute of Agrophysics, PAS, Poland. The device consists of eight metal-oxide semiconductor (MOS) sensors, which were selected with the following criteria: lower power consumption, a similar type and geometry of the sensors in the array, low susceptibility to humidity and temperature, and common use of the gas sensors tested in a similar measurement device. As ensured by the producers, the sensors strongly respond to the presence of ketones, fatty acids, esters, and alcohols that can be expected in fungal metabolites in granular materials spoilage [7,21]. Table 1S presents the types and technical data of Agrinose sensors. Seven of them (TGS type) were produced by Figaro Engineering (Japan) and one by Ams (USA). A measurement cycle according to the sample protocol consisted of 10 s baseline purge, 100 s sample draw-in, 5 s laboratory air purge and 100 s sample purge. Analog signals were converted to digital signals by means of software DasyLab. Obtained sensorgrams were converted to the \*.xls format and analysed using software Statistica (version 12.0, StatSoft Inc., USA).

Table 1S. Technical data of Agrinose sensors

| Type          | Description                                                                                         | Detecting range (ppm)   |
|---------------|-----------------------------------------------------------------------------------------------------|-------------------------|
| TGS2600 - B00 | General air contaminants, hydrogen and carbon monoxide                                              | 1 - 3 (H <sub>2</sub> ) |
| TGS2610 - C00 | LP gas, butane                                                                                      | 500 - 10 000            |
| TGS2602 - B00 | Ammonia, Hydrogen sulfide (high sensitivity to VOC and odorous gases)                               | 1 - 30 (EtOH)           |
| TGS2611 - C00 | Natural gas, methane                                                                                | 500 - 10 000            |
| TGS2603 - B01 | Odors generated from spoiled foods                                                                  | 1 - 10 (EtOH)           |
| TGS2612 - D00 | Methane, propane and butane                                                                         | 1-25%LEL                |
| TGS2620 - C00 | Solvent vapours, volatile vapors, alcohol                                                           | 50 - 5 000              |
| AS - MLV - P2 | CO, butane, methane, ethanol, hydrogen. Specifically designed for volatile organic compounds (VOCs) | 10 - 10 000             |
