# Supplementary material for: Application of MOX Sensors to Determine the Emission of Volatile Compounds in Corn Groats as a Function of Vertical Pressure in the Silo and Moisture Content of the Bed
Source: Sensors (Basel). 2024 Mar 28;24(7):2187. doi: 10.3390/s24072187 (PMC11014101; doi:10.3390/s24072187)
Supplement: Supplementary file 1 [file sensors-24-02187-s001.zip › 02_Supplementary_materials_Volatile_compounds_.xlsx]

## Sheet: Arkusz1
	alcohols	acids	ketones	esters	hydrocarbons	azines	terpenes	others
01d 14% 0kPa	8.59107	5.84192	17.5258	50.8591	9.62199	3.43643	0	4.12371
01d 14% 40kPa	14.1104	5.93047	30.8793	16.9734	20.0409	0	6.13497	5.93047
01d 14% 80kPa	20.4167	12.7083	24.375	22.5	20	0	0	0
01d 17% 0kPa	28.6525	12.0567	15.8865	32.9078	5.67376	4.8227	0	0
01d 17% 40kPa	24.5421	10.4396	15.7509	21.7949	10.4396	5.86081	5.31136	5.86081
01d 17% 80kPa	35.2442	6.58174	7.21868	17.1975	19.7452	7.00637	7.00637	0
05d 14% 0kPa	5.30303	9.84848	10.9848	66.6667	0	3.0303	0	4.16667
05d 14% 40kPa	18.9333	4.26667	8.26667	34.6667	15.7333	0	4.8	13.3333
05d 14% 80kPa	16.343	15.0485	23.7864	33.4951	6.47249	0	0	4.85437
05d 17% 0kPa	14.1791	11.194	12.3134	44.403	8.58209	3.73134	5.59701	0
05d 17% 40kPa	30.2521	4.36975	4.53782	41.1765	4.36975	5.71429	5.54622	4.03361
05d 17% 80kPa	29.0368	4.53258	8.92351	25.0708	18.5552	4.10765	5.66572	4.10765
06d 14% 0kPa	3.77358	55.0314	7.86164	18.8679	6.28931	3.45912	0	4.71698
06d 14% 40kPa	23.1579	3.85965	7.36842	43.5088	13.3333	0	4.91228	3.85965
06d 14% 80kPa	22.2664	8.15109	24.0557	39.3638	6.16302	0	0	0
06d 17% 0kPa	16.0377	7.86164	20.4403	35.5346	9.43396	3.77358	6.91824	0
06d 17% 40kPa	16	9	4	52.5	8.75	4.25	5.5	0
06d 17% 80kPa	35.4254	5.5788	13.1102	28.3124	8.08926	0	5.71827	3.76569
07d 14% 0kPa	3.47826	50.8696	5.21739	27.3913	6.95652	2.6087	0	3.47826
07d 14% 40kPa	40.3846	11.9658	9.61538	15.812	10.4701	0	5.98291	5.76923
07d 14% 80kPa	13.5135	12.7413	26.4479	35.7143	7.33591	0	0	4.2471
07d 17% 0kPa	17.6871	8.61678	24.4898	31.0658	8.61678	0	6.57596	2.94785
07d 17% 40kPa	31.4578	7.67263	6.13811	39.3862	3.06905	4.09207	5.37084	2.8133
07d 17% 80kPa	43.2143	4.28571	7.85714	14.1071	11.25	4.46429	7.14286	7.67857
08d 14% 0kPa	3.52423	47.5771	1.76211	26.4317	13.2159	0	0	7.48899
08d 14% 40kPa	35.7143	10.084	8.61345	18.4874	10.2941	0	6.51261	10.2941
08d 14% 80kPa	11.7133	15.7343	25	37.4126	6.81818	0	0	3.32168
08d 17% 0kPa	11.1753	12.3314	22.9287	31.5992	11.9461	3.08285	6.93642	0
08d 17% 40kPa	39.4783	6.26087	6.26087	30.087	8.69565	0	6.26087	2.95652
08d 17% 80kPa	40.275	10.2161	7.66208	12.7701	13.7525	4.12574	7.26916	3.92927
09d 14% 0kPa	3.68421	9.47368	12.1053	61.0526	7.36842	0	3.68421	2.63158
09d 14% 40kPa	22.7907	6.04651	49.3023	0	13.0233	0	5.5814	3.25581
09d 14% 80kPa	7.93651	2.1164	72.4868	12.6984	4.7619	0	0	0
09d 17% 0kPa	30.5907	10.1266	33.5443	8.86076	6.96203	2.32068	5.27426	2.32068
09d 17% 40kPa	27.6423	6.09756	45.122	10.9756	6.09756	0	4.06504	0
09d 17% 80kPa	54.9587	2.06612	15.2893	24.7934	0	1.65289	1.23967	0
10d 14% 0kPa	24.902	10	6.27451	20.5882	30.9804	0	0	7.2549
10d 14% 40kPa	17.6471	9.55882	16.1765	41.9118	10.6618	0	4.04412	0
10d 14% 80kPa	8.45771	4.47761	68.1592	13.9303	4.97512	0	0	0
10d 17% 0kPa	31.9196	8.25893	22.0982	24.1071	3.79464	3.79464	4.46429	1.5625
10d 17% 40kPa	26.0073	5.86081	38.4615	20.8791	5.12821	0	3.663	0
10d 17% 80kPa	29.4872	4.2735	46.5812	5.98291	6.83761	2.5641	4.2735	0
11d 14% 0kPa	3.27103	4.6729	61.215	22.4299	3.27103	0	0	5.14019
11d 14% 40kPa	51.7526	11.5464	3.09278	13.8144	14.2268	0	5.56701	0
11d 14% 80kPa	6.39098	5.6391	56.015	24.4361	7.5188	0	0	0
11d 17% 0kPa	32	9	15.5	30	6	2.25	0	5.25
11d 17% 40kPa	45.0472	8.01887	25.9434	17.9245	3.06604	0	0	0
11d 17% 80kPa	35.9606	9.85222	32.5123	3.69458	9.85222	0	5.17241	2.95567

## Sheet: 01dKasza
01dKasza14%_0kPa1
Nazwa
3,6-OCTADECADIYNOIC ACID, METHYL ESTER	34.3643	+
4-(BENZOYLOXY)-2H-PYRAN-3-ONE	10.6529	+
2-THIOPHENEETHANOL,5-(4,5-DIHYDRO-4,4-DIMETHYL-2-OXAZOLYL)-	4.12371	+
BENZYL (5Z,8Z,11Z,14Z)-5,8,11,14-ICOSATETRAENOATE	5.15464	+
BICYCLO[3.1.0]HEXANE, 4-METHYLENE-1-(1-METHYLETHYL)-	6.18557	+
6,9,12-OCTADECATRIENOIC ACID, METHYL ESTER	3.78007	+
HI-OLEIC SAFFLOWER OIL	4.12371	+
13-HEPTADECYN-1-OL	4.46735	+
9H-PYRROLO[3',4':3,4] PYRROLO[2,1-A] PHTHALAZINE-9,11(10H)-DIONE,10-ETHYL-8-PHENYL	3.43643	+
4H-1-BENZOPYRAN-4-ONE, 2-(3,4-DIMETHOXYPHENYL)-3,5-DIHYDROXY-7-METHOXY	3.43643	+
Spirost-8-en-11-one, 3-hydroxy-, (3β,5α,14β,20β,22β,25R)	3.43643	+
TETRADECANOIC ACID, 12-METHYL-, METHYL ESTER	3.09278	+
1-ISOTHIOCYANATO-3-METHYLADAMANTANE	3.43643	+
9-HEXADECENOIC ACID	5.84192	+
HEXADECANOIC ACID, METHYL ESTER	4.46735	+
01dKasza14%_40kPa
Nazwa
DICHLOROMETHYL ETHYL SULFONE	13.4969	+
2-OCTADEC-1''-ENYLOXY-1,1,2,2-TETRADEUTERO ETHANOL	8.17996	+
STIGMAST-5-EN-3-OL, (3β,24S)	5.93047	+
1,3,7-OCTATRIENE, 3,7-DIMETHYL-,	6.13497	+
BICYCLO[3.1.0]HEXANE, 4-METHYLENE-1-(1-METHYLETHYL)	6.13497	+
4H-1-BENZOPYRAN-4-ONE, 2-(3,4-DIHYDROXYPHENYL)-6,8-DI-β-D-GLUCOPYRANOSYL-5,7-DIHYDROXY	5.72597	+
6-AZA-5,7,12,14-TETRATHIAPENTACENE	5.93047	+
6,9,12-OCTADECATRIENOIC ACID, METHYL ESTER	5.72597	+
3,20-DIOXO-11-α-HYDROXYCONANINE-1,4-DIENE	6.13497	+
11,13-DIHYDROXY-TETRADEC-5-YNOIC ACID METHYL ESTER	5.93047	+
4H-1-BENZOPYRAN-4-ONE, 2-(3,4-DIMETHOXYPHENYL)-3,5-DIHYDROXY-7-METHOXY	5.93047	+
4-(5-AMINO-1,3,4-THIADIAZOL-2-YL)-1-OXASPIRO[4,4] NONAN-2-ONE	5.72597	+
5,8,11-HEPTADECATRIYNOIC ACID, METHYL ESTER	5.31697	+
TRICYCLO[4.3.1.1(3,8)] UNDECANE-1-CARBOXYLIC ACID	5.93047	+
[1,1'-BIPHENYL]-4,4'-DIOL, 3,3'-DIMETHOXY	7.77096	+
	100
01dKasza14%_80kPa
Nazwa
3,6-OCTADECADIYNOIC ACID, METHYL ESTER	9.375	+
4-(BENZOYLOXY)-2H-PYRAN-3-ONE	9.58333	+
2-THIOPHENEETHANOL, 5-(4,5-DIHYDRO-4,4-DIMETHYL-2-OXAZOLYL)	6.45833	+
BENZYL (6Z,9Z,12Z)-6,9,12-OCTADECATRIENOATE	6.66667	+
BICYCLO[3.1.0] HEXANE, 4-METHYLENE-1-(1-METHYLETHYL)	6.875	+
6,9,12-OCTADECATRIENOIC ACID, METHYL ESTER	5.625	+
1,2:4,5-DI-O-ISOPROPYLIDENE-8-TETRADECYNE-D-GLYCERO-D-MANNO-1,2,3,4,5,6-HEXOL	7.29167	+
4H-1-BENZOPYRAN-4-ONE, 2-(3,4-DIMETHOXYPHENYL)-3,5-DIHYDROXY-7-METHOXY	6.25	+
CHOLAN-24-OIC ACID, 3,7,12-TRIHYDROXY-, (3α,5β,7α,12α)	6.25	+
3-(HYDROXYMETHYL)-1-PHENYL-1-HEPTADECYN-3-OL	6.66667	+
16-FORMYL-1-HYDROXY-18-AZA-TRICYCLO[10.6.0.0(13,17)]OCTADEC-16-ENE-13,14,14-TRICARBONITRILE	6.45833	+
TRICYCLO[4.3.1.1(3,8)]UNDECANE-1-CARBOXYLIC ACID	6.45833	+
8-CYCLOHEXADECEN-1-ONE	8.54167	+
NONANEDIOIC ACID, DIBUTYL ESTER	7.5	+
	100
01dKasza17%_0kPa
Nazwa
DICHLOROMETHYL ETHYL SUFLONE	7.51773	+
4-(BENZOYLOXY)-2H-PYRAN-3-ONE	8.36879	+
9-OCTADECENOIC ACID, (2-PHENYL-1,3-DIOXOLAN-4-YL)METHYL ESTER, CIS-	7.37589	+
2-THIOPHENEETHANOL, 5-(4,5-DIHYDRO-4,4-DIMETHYL-2-OXAZOLYL)-	7.23404	+
L-TYROSINE, 3-CARBOXY	6.80851	+
CORYNAN-17-OL, 18,19-DIDEHYDRO-10-METHOXY-, ACETATE (ESTER)	6.09929	+
6,9,12-OCTADECATRIENOIC ACID, METHYL ESTER	5.8156	+
2,4(1H)-CYCLO-3,4-SECOAKUAMMILAN-16-CARBOXYLIC ACID, 17-HYDROXY-10-METHOXY-, METHYL ESTER, (16R)	5.67376	+
1,2:4,5-DI-O-ISOPROPYLIDENE-8-TETRADECYNE-D-GLYCERO-D-MANNO-1,2,3,4,5,6-HEXOL	5.67376	+
OXIRANECARBOXAMIDE, 2-ETHYL-3-PROPYL	5.24823	+
9H-PYRROLO[3',4':3,4]PYRROLO[2,1-A] PHTHALAZINE-9,11(10H)-DIONE,10-ETHYL-8-PHENYL	4.8227	+
CHOLAN-24-OIC ACID, 3-(ACETYLOXY)-7-OXO-, METHYL ESTER, (3α,5β)-	4.96454	+
STIGMAST-5-EN-3-OL, (3β,24S)	4.68085	+
ETHYL ISO-ALLOCHOLATE	4.53901	+
HEXADECANOIC ACID, 2-HYDROXY-1,3-PROPANEDIYL ESTER	4.53901	+
13-HEPTADECYN-1-OL	4.96454	+
16-FORMYL-1-HYDROXY-18-AZA-TRICYCLO[10.6.0.0(13,17)] OCTADEC-16-ENE-13,14,14-TRICARBONITRILE	5.67376	+
	100
01dKasza17%_40kPa
Nazwa
DICHLOROMETHYL ETHYL SULFONE	10.2564	+
2-OCTADEC-1''-ENYLOXY-1,1,2,2-TETRADEUTERO ETHANOL	7.69231	+
DI-2-BENZOTHIAZOLE DISULFANE	5.86081	+
2-THIOPHENEETHANOL, 5-(4,5-DIHYDRO-4,4-DIMETHYL-2-OXAZOLYL)-	5.49451	+
BICYCLO[3.1.0]HEXANE, 4-METHYLENE-1-(1-METHYLETHYL)-	5.31136	+
1,3,7-OCTATRIENE, 3,7-DIMETHYL-	5.31136	+
6,9,12-OCTADECATRIENOIC ACID, METHYL ESTER	4.7619	+
2,7-DIPHENYL-1,6-DIOXOPYRIDAZINO[4,5-2',3] PYRROLO[4',5'-D] PYRIDAZINE	5.86081	+
4-HYDROXY-4-METHYL-HEX-5-ENOIC ACID TERT-BUTYL ESTER	5.49451	+
1H-INDOL-2-AMINE, N-HYDROXY-1-METHYL-N-PHENYL-3-[(PHENYLIMINO)METHYL]-,	5.12821	+
5,8,11,14-EICOSATETRAENOIC ACID, METHYL ESTER, (ALL-Z)-	5.12821	+
4H-1-BENZOPYRAN-4-ONE, 2-(3,4-DIMETHOXYPHENYL)-3,5-DIHYDROXY-7-METHOXY-	5.49451	+
CHOLAN-24-OIC ACID, 3,7,12-TRIHYDROXY-, (3α,5β,7α,12α)-	5.12821	+
BENZENEMETHANOL, α-(1-AMINOETHYL)-	4.7619	+
TRICYCLO[4.3.1.1(3,8)]UNDECANE-1-CARBOXYLIC ACID	5.31136	+
13-HEPTADECYN-1-OL	6.59341	+
NONANEDIOIC ACID, DIBUTYL ESTER	6.41026	+
	100
01dKasza17%_80kPa
Nazwa
PROPANE, 1-(ETHENYLOXY)-2-METHYL-	10.1911	+
2-OCTADEC-1''-ENYLOXY-1,1,2,2-TETRADEUTERO ETHANOL	10.828	+
2-THIOPHENEETHANOL, 5-(4,5-DIHYDRO-4,4-DIMETHYL-2-OXAZOLYL)-	7.21868	+
BICYCLO[3.1.0] HEXANE, 4-METHYLENE-1-(1-METHYLETHYL)-	6.79406	+
6,6-DIMETHYL-2-METHYLENE-BICYCLO[3.1.1] HEPTANE	7.00637	+
1,4,8-CYCLOUNDECATRIENE, 2,6,6,9-TETRAMETHYL-, (E,E,E)-	6.36943	+
1,2:4,5-DI-O-ISOPROPYLIDENE-8-TETRADECYNE-D-GLYCERO-D-MANNO-1,2,3,4,5,6-HEXOL	8.49257	+
9,12,15-OCTADECATRIENOIC ACID, (2-PHENYL-1,3-DIOXOLAN-4-YL) METHYL ESTER	7.00637	+
9H-PYRROLO[3',4':3,4]PYRROLO[2,1-A]PHTHALAZINE-9,11(10H)-DIONE,10-ETHYL-8-PHENYL	7.00637	+
4H-1-BENZOPYRAN-4-ONE, 2-(3,4-DIMETHOXYPHENYL)-3,5-DIHYDROXY-7-METHOXY-	7.21868	+
17-HYDROXY-3-OXOANDROST-4-ENE-17-CARBONITRILE	6.58174	+
TRICYCLO[4.3.1.1(3,8)]UNDECANE-1-CARBOXYLIC ACID	6.58174	+
13-HEPTADECYN-1-OL	8.70488	+

## Sheet: 02dKasza
02d 14% 0kPa
Nazwa	%
3,6-octadecadiynoic acid, methyl ester	19.6078	+
2-isopropylidene-3-methyl-1-phenyl-hexa-3,5-dien-1-one	5.23156	+
4-(benzoyloxy)-2H-pyran-3-one	10.1322	+
2-thiopheneethanol, 5-(4,5-dihydro-4,4-dimethyl-2-oxazolyl)-	3.43643	+
L-tyrosine, 3-carboxy-	2.27273	+
Benzyl (5Z,8Z,11Z,14Z)-5,8,11,14- icosatetraenoate	4.12371	+
Bicyclo[3.1.0]hexane, 4-methylene-1-(1-methylethyl)-	5.4902	+
6,9,12-octadecatrienoic acid, methyl ester	3.43643	+
Hi-oleic safflower oil	2.27273	+
13-heptadecyn-1-ol	3.43643	+
9H-pyrrolo[3',4':3,4] pyrrolo[2,1-A]phthalazine-9,11(10H)-dione, 10-ethyl-8-phenyl	2.65152	+
Corynan-17-ol, 18,19-didehydro-10-methoxy	3.86038	+
4H-1-benzopyran-4-one, 2-(3,4-dimethoxyphenyl)-3,5-dihydroxy-7-methoxy	3.12	+
Spirost-8-en-11-one, 3-hydroxy-, (3β,5α,14β,20β,22β,25R)	3.09278	+
Tetradecanoic acid, 12-methyl-, methyl ester	2.65152	+
1-isothiocyanato-3-methyladamantane	2.6087	+
9-hexadecenoic acid	16.8931	+
Hexadecanoic acid, methyl ester	5.68182	+
	100
02d 14% 40 kPa
Nazwa	%
Propane, 1-(ethenyloxy)-2-methyl	6.716	+
Dichloromethyl ethyl sulfone	16.1765	+
2-octadec-1''-enyloxy-1,1,2,2-tetradeutero ethanol	7.05128	+
Stigmast-5-en-3-ol, (3β,24S)	4.26667	+
1,3,7-octatriene, 3,7-dimethyl-	5.98291	+
Bicyclo[3.1.0]hexane, 4-methylene-1-(1-methylethyl)	4.91228	+
4H-1-benzopyran-4-one, 2-(3,4-dihydroxyphenyl)-6,8-DI-β-D-glucopyranosyl-5,7-dihydroxy	4.26667	+
6,9,12-octadecatrienoic acid, methyl ester	4.21053	+
6-aza-5,7,12,14-tetrathiapentacene	4.70085	+
3,20-dioxo-11-α-hydroxyconanine-1,4-diene	4.57009	+
11,13-dihydroxy-teteradec-5-ynoic acid methyl ester	5.75971	+
4H-1-benzopyran-4-one, 2-(3,4-dimethoxyphenyl)-3,5-dihydroxy-7-methoxy-	5.72597	+
4-(5-amino-1,3,4-thiadiazol-2-yl)-1-oxaspiro[4,4] nonan-2-one	4.57009	+
5,8,11-heptadecatriynoic acid, methyl ester	3.65	+
Tricyclo[4.3.1.1(3,8)] undecane-1-carboxylic acid	4.41176	+
13-heptadecyn-1-ol	7.47863	+
[1,1'-biphenyl]-4,4'-diol, 3,3'-dimethoxy	5.55556	+
	100.005
02d 14% 80 kPa
Nazwa	%
3,6-octadecadiynoic acid, methyl ester	10.0828	+
4-(benzoyloxy)-2H-pyran-3-one	9.43839	+
2-thiopheneethanol, 5-(4,5-dihydro-4,4-dimethyl-2-oxazolyl)	5.85227	+
Benzyl (6Z,9Z,12Z)-6,9,12-octadecatrienoate	6.55034	+
Bicyclo[3.1.0] hexane, 4-methylene-1-(1-methylethyl)	7.4009	+
6,9,12-octadecatrienoic acid, methyl ester	8.57245	+
Hi-oleic safflower oil	3.03257	+
1,2:4,5-DI-I-isopropylidene-8-tetradecyne-D-glycero-D-manno-1,2,3,4,5,6-hexol	7.19167	+
5,8,11,14-eicosatetraenoic acid, methyl ester, (all-Z)	7.53987	+
4H-1-benzopyran-4-one, 2-(3,4-dimethoxyphenyl)-3,5-dihydroxy-7-methoxy	4.6968	+
Cholan-24-oic acid, 3,7,12-trihydroxy-, (3α,5β,7α,12α)	4.05405	+
3-(hydroxymethyl)-1-phenyl-1-heptadecyn-3-ol	6.52896	+
16-formyl-1-hydroxy-18-aza-tricyclo[10.6.0.0(13,17)]octadec-16-ene-13,14,14-tricarbonitrile	5.31236	+
Tricyclo[4.3.1.1(3,8)]undecane-1-carboxylic acid	6.25	+
8-cyclohexadecen-1-one	7.5	+
	100.003
02d 17% 0 kPa
Nazwa	%
Propane, 1-(ethenyloxy)-2-methyl	16.097	+
Dichloromethyl ethyl sulfone	5.8156	+
4-(benzoyloxy)-2H-pyran-3-one	7.37589	+
9-octadecenoic acid, (2-phenyl-1,3-dioxolan-4-yl)methyl ester, cis-	5.93642	+
2-thiopheneethanol, 5-(4,5-dihydro-4,4-dimethyl-2-oxazolyl)-	5.24823	+
L-tyrosine, 3-carboxy	4.66122	+
Corynan-17-ol, 18,19-didehydro-10-methoxy-, acetate (ester)	4.01793	+
6,6-dimethyl-2-methylene-bicyclo[3.1.1] heptane	1.63334	+
6,9,12-octadecatrienoic acid, methyl ester	4.66122	+
2,4(1H)-cyclo-3,4-secoakuammilan-16-carboxylic acid, 17-hydroxy-10-methoxy-, methyl ester, (16R)	4.37464	+
1,2:4,5-DI-O-isopropylidene-8-tetradecyne-D-glycero-D-manno-1,2,3,4,5,6-hexol	5.21036	+
Oxiranecarboxamide, 2-ethyl-3-propyl	4.81696	+
9H-pyrrolo[3',4':3,4]pyrrolo[2,1-A] phthalazine-9,11(10H)-dione, 10-ethyl-8-phenyl	4.08805	+
Cholan-24-oic acid, 3-(acetyloxy)-7-oxo-, methyl ester, (3α,5β)-	4.16	+
Stigmast-5-en-3-ol, (3β,24S)	4.08805	+
Ethyl iso-allocholate	4.30839	+
Hexadecanoic acid, 2-hydroxy-1,3-propanediyl ester	4.08805	+
13-heptadecyn-1-ol	4.99007	+
16-formyl-1-hydroxy-18-aza-tricyclo[10.6.0.0(13,17)] octadec-16-ene-13,14,14-tricarbonitrile	4.68085	+
	100.252
02d 17% 40 kPa
Nazwa	%
Propane, 1-(ethenyloxy)-2-methyl-	8.47689	+
Dichloromethyl ethyl sulfone	7.40513	+
2-octadec-1''-enyloxy-1,1,2,2-tetradeutero ethanol	8.59341	+
10,13-octadecadiynoic acid, methyl ester	4.09207	+
DI-2-benzothiazole disulfane	5.12821	+
2-thiopheneethanol, 5-(4,5-dihydro-4,4-dimethyl-2-oxazolyl)-	5.25	+
Bicyclo[3.1.0] hexane, 4-methylene-1-(1-methylethyl)-	3.75	+
1,3,7-octatriene, 3,7-dimethyl-	5.25	+
6,9,12-octadecatrienoic acid, methyl ester	5.54622	+
2,7-diphenyl-1,6-dioxopyridazino[4,5-2',3'] pyrrolo[4',5'-D]pyridazine	4.38261	+
4-hydroxy-4-methyl-hex-5-enoic acid tert-butyl ester	4.20168	+
1H-indol-2-amine, N-hydroxy-1-methyl-N-phenyl-3-[(phenylimino)methyl]-,	4.53782	+
5,8,11,14-eicosatetraenoic acid, methyl ester, (all-Z)-	4.20168	+
4H-1-benzopyran-4-one, 2-(3,4-dimethoxyphenyl)-3,5-dihydroxy-7-methoxy-	5.25	+
Cholan-24-oic acid, 3,7,12-trihydroxy-, (3α,5β,7α,12α)-	4.53782	+
Benzenemethanol, α-(1-aminoethyl)-	4.36975	+
Tricyclo[4.3.1.1(3,8)]undecane-1-carboxylic acid	4.53782	+
13-heptadecyn-1-ol	5.25	+
Nonanedioic acid, dibutyl ester	5.25	+
	100.011
02d 17% 80 kPa
Nazwa	%
Propane, 1-(ethenyloxy)-2-methyl-	10.828	+
2-octadec-1''-enyloxy-1,1,2,2-tetradeutero ethanol	10.1734	+
Ethyl 4-cyano-2-oxo-1-oxaspiro[4,5]decane-3-carboxylate	3.92857	+
2-thiopheneethanol, 5-(4,5-dihydro-4,4-dimethyl-2-oxazolyl)-	6.79406	+
Bicyclo[3.1.0] hexane, 4-methylene-1-(1-methylethyl)-	6.53258	+
2-octen-1-ol, (Z)-	4.32357	+
6,6-dimethyl-2-methylene-bicyclo[3.1.1] heptane	6.90652	+
1,4,8-cycloundecatriene, 2,6,6,9-tetramethyl-, (E,E,E)-	6.85774	+
Hi-oleic safflower oil	5.43774	+
1,2:4,5-DI-O-isopropylidene-8-tetradecyne-D-manno-1,2,3,4,5,6-hexol	7.32143	+
9,12,15-octadecatrienoic acid, (2-phenyl-1,3-dioxolan-4-yl) methyl ester	5.35714	+
9H-pyrrolo[3',4':3,4]pyrrolo[2,1-A]phthalazine-9,11(10H)-dione, 10-ethyl-8-phenyl	6.28684	+
4H-1-benzopyran-4-one, 2-(3,4-dimethoxyphenyl)-3,5-dihydroxy-7-methoxy-	5.85774	+
Tricyclo[4.3.1.1(3,8)]undecane-1-carboxylic acid	6.31735	+
13-heptadecyn-1-ol	7.07269	+
	99.9954

## Sheet: 03dKasza
03d 14% 0 kPa
Nazwa	%
3,6-octadecadiynoic acid, methyl ester	16.0784	+
2-isopropylidene-3-methyl-1-phenyl-hexa-3,5-dien-1-one	5.76043	+
4-(benzoyloxy)-2H-pyran-3-one	11.215	+
2-thiopheneethanol, 5-(4,5-dihydro-4,4-dimethyl-2-oxazolyl)-	3.39278	+
L-tyrosine, 3-carboxy-	2.20126	+
Benzyl (5Z,8Z,11Z,14Z)-5,8,11,14- icosatetraenoate	2.27273	+
Bicyclo[3.1.0]hexane, 4-methylene-1-(1-methylethyl)-	3.27103	+
6,9,12-octadecatrienoic acid, methyl ester	2.6087	+
Hi-oleic safflower oil	2.51572	+
13-heptadecyn-1-ol	2.51572	+
9H-pyrrolo[3',4':3,4] pyrrolo[2,1-A]phthalazine-9,11(10H)-dione, 10-ethyl-8-phenyl	1.57895	+
4H-1-benzopyran-4-one, 2-(3,4-dimethoxyphenyl)-3,5-dihydroxy-7-methoxy	2.82026	+
Spirost-8-en-11-one, 3-hydroxy-, (3β,5α,14β,20β,22β,25R)	2.6087	+
Tetradecanoic acid, 12-methyl-, methyl ester	2.63158	+
1-isothiocyanato-3-methyladamantane	2.3343	+
9-hexadecenoic acid	29.5304	+
Hexadecanoic acid, methyl ester	6.66667	+
	100.003
03d 14% 40 kPa
Nazwa	%
Propane, 1-(ethenyloxy)-2-methyl	17.1765	+
Dichloromethyl ethyl sulfone	7.05128	+
2-octadec-1''-enyloxy-1,1,2,2-tetradeutero ethanol	7.98319	+
Stigmast-5-en-3-ol, (3β,24S)	4.21053	+
1,3,7-octatriene, 3,7-dimethyl-	4.04412	+
Bicyclo[3.1.0]hexane, 4-methylene-1-(1-methylethyl)	5.55556	+
4H-1-benzopyran-4-one, 2-(3,4-dihydroxyphenyl)-6,8-DI-β-D-glucopyranosyl-5,7-dihydroxy	3.50877	+
6,9,12-octadecatrienoic acid, methyl ester	3.85965	+
6-aza-5,7,12,14-tetrathiapentacene	4.91453	+
3,20-dioxo-11-α-hydroxyconanine-1,4-diene	4.95299	+
11,13-dihydroxy-teteradec-5-ynoic acid methyl ester	4.66667	+
4H-1-benzopyran-4-one, 2-(3,4-dimethoxyphenyl)-3,5-dihydroxy-7-methoxy-	4.26667	+
4-(5-amino-1,3,4-thiadiazol-2-yl)-1-oxaspiro[4,4] nonan-2-one	4.26667	+
5,8,11-heptadecatriynoic acid, methyl ester	7.98319	+
Tricyclo[4.3.1.1(3,8)] undecane-1-carboxylic acid	3.67647	+
13-heptadecyn-1-ol	7.98319	+
[1,1'-biphenyl]-4,4'-diol, 3,3'-dimethoxy	4.41176	+
	100.512
03d 14% 80 kPa
Nazwa	%
3,6-octadecadiynoic acid, methyl ester	12.7823	+
4-(benzoyloxy)-2H-pyran-3-one	9.96001	+
2-thiopheneethanol, 5-(4,5-dihydro-4,4-dimethyl-2-oxazolyl)	5.68145	+
Benzyl (6Z,9Z,12Z)-6,9,12-octadecatrienoate	6.2547	+
Bicyclo[3.1.0] hexane, 4-methylene-1-(1-methylethyl)	7.09143	+
6,9,12-octadecatrienoic acid, methyl ester	7.76495	+
Benzenemethanol, α-(1-aminoethyl)	2.59805	+
Hi-oleic safflower oil	3.63984	+
1,2:4,5-DI-I-isopropylidene-8-tetradecyne-D-glycero-D-manno-1,2,3,4,5,6-hexol	6.96667	+
5,8,11,14-eicosatetraenoic acid, methyl ester, (all-Z)	6.69864	+
4H-1-benzopyran-4-one, 2-(3,4-dimethoxyphenyl)-3,5-dihydroxy-7-methoxy	4.85437	+
Cholan-24-oic acid, 3,7,12-trihydroxy-, (3α,5β,7α,12α)	3.64021	+
3-(hydroxymethyl)-1-phenyl-1-heptadecyn-3-ol	4.7619	+
16-formyl-1-hydroxy-18-aza-tricyclo[10.6.0.0(13,17)]octadec-16-ene-13,14,14-tricarbonitrile	4.80317	+
Tricyclo[4.3.1.1(3,8)]undecane-1-carboxylic acid	5.21236	+
8-cyclohexadecen-1-one	7.29167	+
	100.002
03d 17% 0 kPa
Nazwa	%
Propane, 1-(ethenyloxy)-2-methyl	17.3214	+
Dichloromethyl ethyl sulfone	4.66122	+
4-(benzoyloxy)-2H-pyran-3-one	7.23404	+
9-octadecenoic acid, (2-phenyl-1,3-dioxolan-4-yl)methyl ester, cis-	5.27426	+
2-thiopheneethanol, 5-(4,5-dihydro-4,4-dimethyl-2-oxazolyl)-	4.81696	+
L-tyrosine, 3-carboxy	4.01793	+
Bicyclo[3.1.0] hexane, 4-methylene-1-(1-methylethyl)	4.08805	+
Corynan-17-ol, 18,19-didehydro-10-methoxy-, acetate (ester)	4.37464	+
6,6-dimethyl-2-methylene-bicyclo[3.1.1] heptane	2.95457	+
6,9,12-octadecatrienoic acid, methyl ester	4.01793	+
2,4(1H)-cyclo-3,4-secoakuammilan-16-carboxylic acid, 17-hydroxy-10-methoxy-, methyl ester, (16R)	3.73134	+
1,2:4,5-DI-O-isopropylidene-8-tetradecyne-D-glycero-D-manno-1,2,3,4,5,6-hexol	4.5084	+
Oxiranecarboxamide, 2-ethyl-3-propyl	3.15527	+
9H-pyrrolo[3',4':3,4]pyrrolo[2,1-A] phthalazine-9,11(10H)-dione, 10-ethyl-8-phenyl	3.40136	+
Cholan-24-oic acid, 3-(acetyloxy)-7-oxo-, methyl ester, (3α,5β)-	4.81696	+
Stigmast-5-en-3-ol, (3β,24S)	3.60812	+
Ethyl iso-allocholate	4.81696	+
Hexadecanoic acid, 2-hydroxy-1,3-propanediyl ester	3.62812	+
13-heptadecyn-1-ol	5.30839	+
16-formyl-1-hydroxy-18-aza-tricyclo[10.6.0.0(13,17)] octadec-16-ene-13,14,14-tricarbonitrile	4.08805	+
	99.824
03d 17% 40 kPa
Nazwa	%
Propane, 1-(ethenyloxy)-2-methyl-	10.9202	+
Dichloromethyl ethyl sulfone	5.25	+
2-octadec-1''-enyloxy-1,1,2,2-tetradeutero ethanol	9.25	+
10,13-octadecadiynoic acid, methyl ester	4.34783	+
DI-2-benzothiazole disulfane	4.53782	+
2-thiopheneethanol, 5-(4,5-dihydro-4,4-dimethyl-2-oxazolyl)-	4.09207	+
Bicyclo[3.1.0] hexane, 4-methylene-1-(1-methylethyl)-	3.06905	+
1,3,7-octatriene, 3,7-dimethyl-	4.34783	+
6,9,12-octadecatrienoic acid, methyl ester	5.5	+
Hi-oleic safflower oil	5.71429	+
2,7-diphenyl-1,6-dioxopyridazino[4,5-2',3'] pyrrolo[4',5'-D]pyridazine	4.36975	+
4-hydroxy-4-methyl-hex-5-enoic acid tert-butyl ester	3.75	+
1H-indol-2-amine, N-hydroxy-1-methyl-N-phenyl-3-[(phenylimino)methyl]-,	4.34783	+
5,8,11,14-eicosatetraenoic acid, methyl ester, (all-Z)-	3.75	+
4H-1-benzopyran-4-one, 2-(3,4-dimethoxyphenyl)-3,5-dihydroxy-7-methoxy-	4.09207	+
Cholan-24-oic acid, 3,7,12-trihydroxy-, (3α,5β,7α,12α)-	4.99	+
Benzenemethanol, α-(1-aminoethyl)-	4.09207	+
Tricyclo[4.3.1.1(3,8)]undecane-1-carboxylic acid	4	+
13-heptadecyn-1-ol	5.49451	+
Nonanedioic acid, dibutyl ester	4.09207	+
	100.007
03d 17% 80 kPa
Nazwa	%
Propane, 1-(ethenyloxy)-2-methyl-	10.1734	+
2-octadec-1''-enyloxy-1,1,2,2-tetradeutero ethanol	10.5122	+
Ethyl 4-cyano-2-oxo-1-oxaspiro[4,5]decane-3-carboxylate	4.46304	+
2-thiopheneethanol, 5-(4,5-dihydro-4,4-dimethyl-2-oxazolyl)-	6.53258	+
Bicyclo[3.1.0] hexane, 4-methylene-1-(1-methylethyl)-	5.10765	+
2-octen-1-ol, (Z)-	4.46429	+
6,6-dimethyl-2-methylene-bicyclo[3.1.1] heptane	6.31735	+
1,4,8-cycloundecatriene, 2,6,6,9-tetramethyl-, (E,E,E)-	10.3571	+
Hi-oleic safflower oil	5.35714	+
1,2:4,5-DI-O-isopropylidene-8-tetradecyne-D-manno-1,2,3,4,5,6-hexol	7.07269	+
9,12,15-octadecatrienoic acid, (2-phenyl-1,3-dioxolan-4-yl) methyl ester	5.30452	+
9H-pyrrolo[3',4':3,4]pyrrolo[2,1-A]phthalazine-9,11(10H)-dione, 10-ethyl-8-phenyl	5.35714	+
4H-1-benzopyran-4-one, 2-(3,4-dimethoxyphenyl)-3,5-dihydroxy-7-methoxy-	5.35714	+
Tricyclo[4.3.1.1(3,8)]undecane-1-carboxylic acid	6.35439	+
13-heptadecyn-1-ol	7.28684	+
	100.018

## Sheet: 04dKasza
04d 14% 0 kPa
Nazwa	%
3,6-octadecadiynoic acid, methyl ester	10.1322	+
2-isopropylidene-3-methyl-1-phenyl-hexa-3,5-dien-1-one	6.28931	+
4-(benzoyloxy)-2H-pyran-3-one	10.5263	+
2-thiopheneethanol, 5-(4,5-dihydro-4,4-dimethyl-2-oxazolyl)-	3.6087	+
L-tyrosine, 3-carboxy-	1.93939	+
Benzyl (5Z,8Z,11Z,14Z)-5,8,11,14- icosatetraenoate	2.01572	+
Benzenamine, N-(10,11-dihydro-5H-dibenzo[A,D]cyclohepten-5-ylidene)-, N-oxide	1.76211	+
Bicyclo[3.1.0]hexane, 4-methylene-1-(1-methylethyl)-	2.20126	+
6,9,12-octadecatrienoic acid, methyl ester	2.17391	+
Hi-oleic safflower oil	1.73913	+
13-heptadecyn-1-ol	1.73913	+
9H-pyrrolo[3',4':3,4] pyrrolo[2,1-A]phthalazine-9,11(10H)-dione, 10-ethyl-8-phenyl	1.24	+
4H-1-benzopyran-4-one, 2-(3,4-dimethoxyphenyl)-3,5-dihydroxy-7-methoxy	2.74586	+
Spirost-8-en-11-one, 3-hydroxy-, (3β,5α,14β,20β,22β,25R)	1.67895	+
Tetradecanoic acid, 12-methyl-, methyl ester	3.52423	+
1-isothiocyanato-3-methyladamantane	1.69474	+
9-hexadecenoic acid	32.0935	+
Hexadecanoic acid, methyl ester	12.8931	+
	99.9975
04d 14% 40 kPa
Nazwa	%
Propane, 1-(ethenyloxy)-2-methyl	24.3675	+
Dichloromethyl ethyl sulfone	6.72269	+
2-octadec-1''-enyloxy-1,1,2,2-tetradeutero ethanol	7.47863	+
Stigmast-5-en-3-ol, (3β,24S)	3.25581	+
1,3,7-octatriene, 3,7-dimethyl-	4.18605	+
Bicyclo[3.1.0]hexane, 4-methylene-1-(1-methylethyl)	4.8	+
4H-1-benzopyran-4-one, 2-(3,4-dihydroxyphenyl)-6,8-DI-β-D-glucopyranosyl-5,7-dihydroxy	2.9907	+
6,9,12-octadecatrienoic acid, methyl ester	4.20168	+
6-aza-5,7,12,14-tetrathiapentacene	4.70085	+
3,20-dioxo-11-α-hydroxyconanine-1,4-diene	3.85965	+
11,13-dihydroxy-teteradec-5-ynoic acid methyl ester	3.85965	+
4H-1-benzopyran-4-one, 2-(3,4-dimethoxyphenyl)-3,5-dihydroxy-7-methoxy-	4.48718	+
4-(5-amino-1,3,4-thiadiazol-2-yl)-1-oxaspiro[4,4] nonan-2-one	3.53088	+
5,8,11-heptadecatriynoic acid, methyl ester	7.98319	+
Tricyclo[4.3.1.1(3,8)] undecane-1-carboxylic acid	4.20168	+
13-heptadecyn-1-ol	5.5814	+
[1,1'-biphenyl]-4,4'-diol, 3,3'-dimethoxy	3.79698	+
	100.005
04d 14% 80 kPa
Nazwa	%
3,6-octadecadiynoic acid, methyl ester	14.4817	+
4-(benzoyloxy)-2H-pyran-3-one	10.4816	+
2-thiopheneethanol, 5-(4,5-dihydro-4,4-dimethyl-2-oxazolyl)	5.51063	+
Benzyl (6Z,9Z,12Z)-6,9,12-octadecatrienoate	5.95907	+
6-imino-8-(4'-methylphenyl)-2,3,4,6-tetrahydro-pyrido[2,1-B][1,3]thiazine-7-carbonitrile	3.41437	+
Bicyclo[3.1.0] hexane, 4-methylene-1-(1-methylethyl)	6.78196	+
6,9,12-octadecatrienoic acid, methyl ester	6.95745	+
Benzenemethanol, α-(1-aminoethyl)	3.32168	+
Hi-oleic safflower oil	4.2471	+
1,2:4,5-DI-I-isopropylidene-8-tetradecyne-D-glycero-D-manno-1,2,3,4,5,6-hexol	6.80417	+
5,8,11,14-eicosatetraenoic acid, methyl ester, (all-Z)	5.85741	+
4H-1-benzopyran-4-one, 2-(3,4-dimethoxyphenyl)-3,5-dihydroxy-7-methoxy	4.37376	+
Cholan-24-oic acid, 3,7,12-trihydroxy-, (3α,5β,7α,12α)	3.9801	+
3-(hydroxymethyl)-1-phenyl-1-heptadecyn-3-ol	2.98507	+
16-formyl-1-hydroxy-18-aza-tricyclo[10.6.0.0(13,17)]octadec-16-ene-13,14,14-tricarbonitrile	2.1164	+
Tricyclo[4.3.1.1(3,8)]undecane-1-carboxylic acid	5.22355	+
8-cyclohexadecen-1-one	7.5	+
	99.9961
04d 17% 0 kPa
Nazwa	%
Propane, 1-(ethenyloxy)-2-methyl	22.31	+
Dichloromethyl ethyl sulfone	4.01793	+
4-(benzoyloxy)-2H-pyran-3-one	7.0922	+
9-octadecenoic acid, (2-phenyl-1,3-dioxolan-4-yl)methyl ester, cis-	4.46429	+
2-thiopheneethanol, 5-(4,5-dihydro-4,4-dimethyl-2-oxazolyl)-	3.15527	+
L-tyrosine, 3-carboxy	4.37464	+
Bicyclo[3.1.0] hexane, 4-methylene-1-(1-methylethyl)	3.1746	+
Corynan-17-ol, 18,19-didehydro-10-methoxy-, acetate (ester)	3.73134	+
6,6-dimethyl-2-methylene-bicyclo[3.1.1] heptane	4.27579	+
6,9,12-octadecatrienoic acid, methyl ester	4.37464	+
2,4(1H)-cyclo-3,4-secoakuammilan-16-carboxylic acid, 17-hydroxy-10-methoxy-, methyl ester, (16R)	4.08805	+
1,2:4,5-DI-O-isopropylidene-8-tetradecyne-D-glycero-D-manno-1,2,3,4,5,6-hexol	4.80644	+
Oxiranecarboxamide, 2-ethyl-3-propyl	3.73134	+
9H-pyrrolo[3',4':3,4]pyrrolo[2,1-A] phthalazine-9,11(10H)-dione, 10-ethyl-8-phenyl	3.27553	+
Cholan-24-oic acid, 3-(acetyloxy)-7-oxo-, methyl ester, (3α,5β)-	3.37553	+
Stigmast-5-en-3-ol, (3β,24S)	3.46821	+
Ethyl iso-allocholate	3.37553	+
Hexadecanoic acid, 2-hydroxy-1,3-propanediyl ester	3.46821	+
13-heptadecyn-1-ol	5.81696	+
16-formyl-1-hydroxy-18-aza-tricyclo[10.6.0.0(13,17)] octadec-16-ene-13,14,14-tricarbonitrile	3.62812	+
	100.005
04d 17% 40 kPa
Nazwa	%
Propane, 1-(ethenyloxy)-2-methyl-	14.3634	+
Dichloromethyl ethyl sulfone	4.06905	+
2-octadec-1''-enyloxy-1,1,2,2-tetradeutero ethanol	9.49451	+
10,13-octadecadiynoic acid, methyl ester	5.53782	+
DI-2-benzothiazole disulfane	4.34783	+
2-thiopheneethanol, 5-(4,5-dihydro-4,4-dimethyl-2-oxazolyl)-	4.34783	+
Bicyclo[3.1.0] hexane, 4-methylene-1-(1-methylethyl)-	2.03252	+
1,3,7-octatriene, 3,7-dimethyl-	5.21739	+
6,9,12-octadecatrienoic acid, methyl ester	5.37084	+
Hi-oleic safflower oil	4.25	+
2,7-diphenyl-1,6-dioxopyridazino[4,5-2',3'] pyrrolo[4',5'-D]pyridazine	4	+
4-hydroxy-4-methyl-hex-5-enoic acid tert-butyl ester	3.96905	+
1H-indol-2-amine, N-hydroxy-1-methyl-N-phenyl-3-[(phenylimino)methyl]-,	4.38261	+
5,8,11,14-eicosatetraenoic acid, methyl ester, (all-Z)-	2.8133	+
4H-1-benzopyran-4-one, 2-(3,4-dimethoxyphenyl)-3,5-dihydroxy-7-methoxy-	4.34783	+
Cholan-24-oic acid, 3,7,12-trihydroxy-, (3α,5β,7α,12α)-	3.06905	+
Benzenemethanol, α-(1-aminoethyl)-	4.20168	+
Tricyclo[4.3.1.1(3,8)]undecane-1-carboxylic acid	4.06905	+
13-heptadecyn-1-ol	5.79451	+
Nonanedioic acid, dibutyl ester	4.34783	+
	100.026
04d 17% 80 kPa
Nazwa	%
Propane, 1-(ethenyloxy)-2-methyl-	10.5122	+
2-octadec-1''-enyloxy-1,1,2,2-tetradeutero ethanol	10.851	+
Ethyl 4-cyano-2-oxo-1-oxaspiro[4,5]decane-3-carboxylate	4.92927	+
2-thiopheneethanol, 5-(4,5-dihydro-4,4-dimethyl-2-oxazolyl)-	6.93101	+
Bicyclo[3.1.0] hexane, 4-methylene-1-(1-methylethyl)-	5.32357	+
2-octen-1-ol, (Z)-	4.12574	+
6,6-dimethyl-2-methylene-bicyclo[3.1.1] heptane	6.05439	+
1,4,8-cycloundecatriene, 2,6,6,9-tetramethyl-, (E,E,E)-	11.2287	+
Hi-oleic safflower oil	5.30452	+
1,2:4,5-DI-O-isopropylidene-8-tetradecyne-D-manno-1,2,3,4,5,6-hexol	6.28684	+
9,12,15-octadecatrienoic acid, (2-phenyl-1,3-dioxolan-4-yl) methyl ester	4.53258	+
9H-pyrrolo[3',4':3,4]pyrrolo[2,1-A]phthalazine-9,11(10H)-dione, 10-ethyl-8-phenyl	4.53258	+
4H-1-benzopyran-4-one, 2-(3,4-dimethoxyphenyl)-3,5-dihydroxy-7-methoxy-	5.30452	+
Tricyclo[4.3.1.1(3,8)]undecane-1-carboxylic acid	5.66572	+
13-heptadecyn-1-ol	8.49257	+
	100.075

## Sheet: 05dKasza
05dKasza14%_0kPa
Nazwa
2-ISOPROPYLIDENE-3-METHYL-1-PHENYL-HEXA-3,5-DIEN-1-ONE	6.81818	+
2-THIOPHENEETHANOL, 5-(4,5-DIHYDRO-4,4-DIMETHYL-2-OXAZOLYL)	3.40909	+
L-TYROSINE, 3-CARBOXY	1.89394	+
BENZENAMINE, N-(10,11-DIHYDRO-5H-DIBENZO[A,D]CYCLOHEPTEN-5-YLIDENE)-, N-OXIDE	2.27273	+
4H-1-BENZOTHIOPYRAN-4-ONE, 3-[(4-METHYLPHENYL)AMINO]-, 1-OXIDE	1.51515	+
6-AZA-5,7,12,14-TETRATHIAPENTACENE	1.89394	+
PREGN-4-ENE-21-CARBOXYLIC ACID, 7-(ACETYLTHIO)-17-HYDROXY-3-OXO-, τ-LACTONE, (7α,17α)	2.27273	+
CORYNAN-17-OL, 18,19-DIDEHYDRO-10-METHOXY	1.89394	+
4H-1-BENZOPYRAN-4-ONE, 2-(3,4-DIMETHOXYPHENYL)-3,5-DIHYDROXY-7-METHOXY	2.65152	+
9,12,15-OCTADECATRIENOIC ACID, (2-PHENYL-1,3-DIOXOLAN-4-YL) METHYL ESTER	2.65152	+
2,7-DIPHENYL-1,6-DIOXOPYRIDAZINO[4,5-2',3]PYRROLO[4',5'-D]PYRIDAZINE	3.0303	+
TETRADECANOIC ACID, 12-METHYL-, METHYL ESTER	3.78788	+
9-HEXADECENOIC ACID	37.8788	+
HEXADECANOIC ACID, METHYL ESTER	18.5606	+
PENTADECANOIC ACID	5.68182	+
HEXADECANOIC ACID, 14-METHYL-, METHYL ESTER	3.78788	+
05dKasza14%_40kPa
Nazwa
PROPANE, 1-(ETHENYLOXY)-2-METHYL	26.6667	+
2-OCTADEC-1''-ENYLOXY-1,1,2,2-TETRADEUTERO ETHANOL	8.8	+
2-THIOPHENEETHANOL, 5-(4,5-DIHYDRO-4,4-DIMETHYL-2-OXAZOLYL)	4.26667	+
1,3,7-OCTATRIENE, 3,7-DIMETHYL-,	4.8	+
3(5)-(4'-CHLOROPHENYL)-4-NITROSO-5(3)-PHENYLAMINOPYRAZOLE	4	+
BICYCLO[3.1.0]HEXANE, 4-METHYLENE-1-(1-METHYLETHYL)	5.33333	+
1,4,8-CYCLOUNDECATRIENE, 2,6,6,9-TETRAMETHYL-, (E,E,E)-	6.13333	+
6,9,12-OCTADECATRIENOIC ACID, METHYL ESTER	4	+
6-AZA-5,7,12,14-TETRATHIAPENTACENE	5.06667	+
5A-METHOXY-9A-METHYL-3-[1-PROPENYL] DECAHYDRO-1H,9H-PYRANO[4,3-B] CHROMENE-1,9-DIONE	3.73333	+
3,20-DIOXO-11-α-HYDROXYCONANINE-1,4-DIENE	4.26667	+
4H-1-BENZOPYRAN-4-ONE, 2-(3,4-DIMETHOXYPHENYL)-3,5-DIHYDROXY-7-METHOXY	4.53333	+
5-BENZOFURANACETIC ACID, 6-ETHENYL-2,4,5,6,7,7A-HEXAHYDRO-3,6-DIMETHYL-α-METHYLENE-2-OXO-, METHYL ESTER	4	+
TRICYCLO[4.3.1.1(3,8)] UNDECANE-1-CARBOXYLIC ACID	4.26667	+
13-HEPTADECYN-1-OL	5.86667	+
HI-OLEIC SAFFLOWER OIL	4.26667	+
05dKasza14%_80kPa
Nazwa
3,6-OCTADECADIYNOIC ACID, METHYL ESTER	16.1812	+
4-(BENZOYLOXY)-2H-PYRAN-3-ONE	11.0032	+
2-THIOPHENEETHANOL, 5-(4,5-DIHYDRO-4,4-DIMETHYL-2-OXAZOLYL)	5.33981	+
L-TYROSINE, 3-CARBOXY	5.01618	+
BENZYL (6Z,9Z,12Z)- 6,9,12-OCTADECATRIENOATE	5.66343	+
6-IMINO-8-(4'-METHYLPHENYL)-2,3,4,6-TETRAHYDRO-PYRIDO[2,1-B][1,3] THIAZINE-7-CARBONITRILE	4.85437	+
BICYCLO[3.1.0] HEXANE, 4-METHYLENE-1-(1-METHYLETHYL)	6.47249	+
6,9,12-OCTADECATRIENOIC ACID, METHYL ESTER	6.6343	+
BENZENEMETHANOL, α-(1-AMINOETHYL)	4.04531	+
HI-OLEIC SAFFLOWER OIL	4.85437	+
1,2:4,5-DI-O-ISOPROPYLIDENE-8-TETRADECYNE-D-GLYCERO-D-MANNO-1,2,3,4,5,6-HEXOL	6.95793	+
5,8,11,14-EICOSATETRAENOIC ACID, METHYL ESTER, (ALL-Z)	5.01618	+
4H-1-BENZOPYRAN-4-ONE, 2-(3,4-DIMETHOXYPHENYL)-3,5-DIHYDROXY-7-METHOXY	4.85437	+
TRICYCLO[4.3.1.1(3,8)]UNDECANE-1-CARBOXYLIC ACID	5.17799	+
8-CYCLOHEXADECEN-1-ONE	7.9288	+
05dKasza17%_0kPa
Nazwa
PROPANE, 1-(ETHENYLOXY)-2-METHYL	37.3134	+
4-(BENZOYLOXY)-2H-PYRAN-3-ONE	8.58209	+
2-THIOPHENEETHANOL, 5-(4,5-DIHYDRO-4,4-DIMETHYL-2-OXAZOLYL)	4.10448	+
L-TYROSINE, 3-CARBOXY	4.10448	+
BICYCLO[3.1.0] HEXANE, 4-METHYLENE-1-(1-METHYLETHYL)	4.85075	+
6,6-DIMETHYL-2-METHYLENE-BICYCLO[3.1.1] HEPTANE	5.59701	+
6,9,12-OCTADECATRIENOIC ACID, METHYL ESTER	3.73134	+
1,2:4,5-DI-O-ISOPROPYLIDENE-8-TETRADECYNE-D-GLYCERO-D-MANNO-1,2,3,4,5,6-HEXOL	4.10448	+
OXIRANECARBOXAMIDE, 2-ETHYL-3-PROPYL	3.35821	+
9H-PYRROLO[3',4':3,4]PYRROLO[2,1-A] PHTHALAZINE-9,11(10H)-DIONE,10-ETHYL-8-PHENYL	3.73134	+
GUANIDINE, N''-[3,5-BIS(TRIFLUOROMETHYL)PHENYL]-N,N,N',N'-TETRAMETHYL	3.73134	+
5,8,11,14-EICOSATETRAENOIC ACID, METHYL ESTER, (ALL-Z)	3.35821	+
2,7-DIPHENYL-1,6-DIOXOPYRIDAZINO[4,5-2',3]PYRROLO[4',5'-D] PYRIDAZINE	3.73134	+
TRICYCLO[4.3.1.1(3,8)] UNDECANE-3-CARBOXYLIC ACID	3.73134	+
13-HEPTADECYN-1-OL	5.97015	+
05dKasza17%_40kPa
Nazwa
PROPANE, 1-(ETHENYLOXY)-2-METHYL-	16.8067	+
2-OCTADEC-1''-ENYLOXY-1,1,2,2-TETRADEUTERO ETHANOL	10.084	+
10,13-OCTADECADIYNOIC ACID, METHYL ESTER	5.04202	+
2-THIOPHENEETHANOL, 5-(4,5-DIHYDRO-4,4-DIMETHYL-2-OXAZOLYL)-	4.87395	+
1-OCTEN-3-OL	4.53782	+
1,3,7-OCTATRIENE, 3,7-DIMETHYL-	5.54622	+
6,9,12-OCTADECATRIENOIC ACID, METHYL ESTER	5.88235	+
HI-OLEIC SAFFLOWER OIL	4.03361
2,7-DIPHENYL-1,6-DIOXOPYRIDAZINO-4,5-2',3']PYRROLO[4',5'-D]PYRIDAZINE	5.71429	+
9,12,15-OCTADECATRIENOIC ACID, METHYL ESTER, (Z,Z,Z)-	4.20168	+
1H-INDOL-2-AMINE, N-HYDROXY-1-METHYL-N-PHENYL-3-[(PHENYLIMINO)METHYL]-,	4.36975	+
4H-1-BENZOPYRAN-4-ONE, 2-(3,4-DIMETHOXYPHENYL)-3,5-DIHYDROXY-7-METHOXY-	4.53782	+
BENZENEMETHANOL, α-(1-AMINOETHYL)-	4.20168	+
DASYCARPIDAN-1-METHANOL, ACETATE (ESTER)	4.03361	+
TRICYCLO[4.3.1.1(3,8)]UNDECANE-1-CARBOXYLIC ACID	4.36975	+
13-HEPTADECYN-1-OL	6.55462	+
PENTADECANOIC ACID, 14-METHYL-, METHYL ESTER	5.21008	+
05dKasza17%_80kPa
Nazwa
PROPANE, 1-(ETHENYLOXY)-2-METHYL-	11.4731	+
2-OCTADEC-1''-ENYLOXY-1,1,2,2-TETRADEUTERO ETHANOL	11.1898	+
ETHYL 4-CYANO-2-OXO-1-OXASPIRO[4,5]DECANE-3-CARBOXYLATE	5.09915	+
BICYCLO[3.1.0] HEXANE, 4-METHYLENE-1-(1-METHYLETHYL)-	5.24079	+
2-OCTEN-1-OL, (Z)-	4.53258	+
6,6-DIMETHYL-2-METHYLENE-BICYCLO[3.1.1] HEPTANE	5.66572	+
1,4,8-CYCLOUNDECATRIENE, 2,6,6,9-TETRAMETHYL-, (E,E,E)-	13.3144	+
HI-OLEIC SAFFLOWER OIL	4.10765	+
1,2:4,5-DI-O-ISOPROPYLIDENE-8-TETRADECYNE-D-GLYCERO-D-MANNO-1,2,3,4,5,6-HEXOL	6.09065	+
9,12,15-OCTADECATRIENOIC ACID, 2,3-DIHYDROXYPROPYL ESTER, (Z,Z,Z)-	4.39093	+
9H-PYRROLO[3',4':3,4]PYRROLO[2,1-A]PHTHALAZINE-9,11(10H)-DIONE,10-ETHYL-8-PHENYL	4.10765	+
4H-1-BENZOPYRAN-4-ONE, 2-(3,4-DIMETHOXYPHENYL)-3,5-DIHYDROXY-7-METHOXY-	4.53258	+
SPIROST-8-EN-11-ONE, 3-HYDROXY-, (3β,5α,14β,20β,22β,25R)-	4.39093	+
6,9,12-OCTADECATRIENOIC ACID, METHYL ESTER	4.10765	+
TRICYCLO[4.3.1.1(3,8)]UNDECANE-1-CARBOXYLIC ACID	4.53258	+
13-HEPTADECYN-1-OL	7.2238	+

## Sheet: 06dKasza
06dKasza14%_0kPa
Nazwa
1,1-DICYCLOPROPYL-2-(TRANS-2-CYCLOPROPYLVINYL)CYCLOPROPANE	6.28931	+
2-THIOPHENEETHANOL, 5-(4,5-DIHYDRO-4,4-DIMETHYL-2-OXAZOLYL)	3.77358	+
L-TYROSINE, 3-CARBOXY	1.88679	+
11,13-DIHYDROXY-TETRADEC-5-YNOIC ACID, METHYL ESTER	1.88679	+
BENZENAMINE, N-(10,11-DIHYDRO-5H-DIBENZO[A,D]CYCLOHEPTEN-5-YLIDENE)-, N-OXIDE	2.20126	+
4H-1-BENZOTHIOPYRAN-4-ONE, 3-[(4-METHYLPHENYL)AMINO]-, 1-OXIDE	1.88679	+
6-AZA-5,7,12,14-TETRATHIAPENTACENE	2.51572	+
3-AMINO-4-[(1-BENZYL-2-METHOXY-2-OXOETHYL)AMINO]-4-OXOBUTANOIC ACID	2.20126	+
PREGN-4-ENE-21-CARBOXYLIC ACID, 7-(ACETYLTHIO)-17-HYDROXY-3-OXO-, τ-LACTONE, (7α,17α)	2.51572	+
4H-1-BENZOPYRAN-4-ONE, 2-(3,4-DIMETHOXYPHENYL)-3,5-DIHYDROXY-7-METHOXY	2.83019	+
4H-1-BENZOPYRAN-4-ONE, 2-(3,4-DIHYDROXYPHENYL)-6,8-DI-β-D-GLUCOPYRANOSYL-5,7-DIHYDROXY	3.14465	+
2,7-DIPHENYL-1,6-DIOXOPYRIDAZINO[4,5-2',3]PYRROLO[4',5'-D]PYRIDAZINE	3.45912	+
CHOLAN-24-OIC ACID, 3,7,12-TRIHYDROXY-, (3α,5β,7α,12α)	4.08805	+
9-HEXADECENOIC ACID	31.4465	+
HEXADECANOIC ACID, METHYL ESTER	16.9811	+
PENTADECANOIC ACID	12.8931	+
06dKasza14%_40kPa
Nazwa
PROPANE, 1-(ETHENYLOXY)-2-METHYL	35.0877	+
2-OCTADEC-1''-ENYLOXY-1,1,2,2-TETRADEUTERO ETHANOL	12.2807	+
2-THIOPHENEETHANOL, 5-(4,5-DIHYDRO-4,4-DIMETHYL-2-OXAZOLYL)	4.21053	+
1,3,7-OCTATRIENE, 3,7-DIMETHYL-,	4.91228	+
BICYCLO[3.1.0]HEXANE, 4-METHYLENE-1-(1-METHYLETHYL)	5.61404	+
1,4,8-CYCLOUNDECATRIENE, 2,6,6,9-TETRAMETHYL-, (E,E,E)-	4.21053	+
6-AZA-5,7,12,14-TETRATHIAPENTACENE	3.85965	+
3H-CYCLODECA[B]FURAN-2-ONE, 4,9-DIHYDROXY-6-METHYL-3,10-DIMETHYLENE-3A,4,7,8,9,10,11,11A-OCTAHYDRO	3.50877	+
3,20-DIOXO-11-α-HYDROXYCONANINE-1,4-DIENE	3.50877	+
4H-1-BENZOPYRAN-4-ONE, 2-(3,4-DIMETHOXYPHENYL)-3,5-DIHYDROXY-7-METHOXY	3.85965	+
9,12,15-OCTADECATRIENOIC ACID, (2-PHENYL-1,3-DIOXOLAN-4-YL)METHYL ESTER	3.50877	+
TRICYCLO[4.3.1.1(3,8)] UNDECANE-1-CARBOXYLIC ACID	3.85965	+
13-HEPTADECYN-1-OL	6.66667	+
PENTADECANOIC ACID, 14-METHYL-, METHYL ESTER	4.91228	+
06dKasza14%_80kPa
Nazwa
3,6-OCTADECADIYNOIC ACID, METHYL ESTER	19.8807	+
4-(BENZOYLOXY)-2H-PYRAN-3-ONE	12.5249	+
2-THIOPHENEETHANOL, 5-(4,5-DIHYDRO-4,4-DIMETHYL-2-OXAZOLYL)	5.16899	+
BENZYL (6Z,9Z,12Z)- 6,9,12-OCTADECATRIENOATE	5.36779	+
BICYCLO[3.1.0] HEXANE, 4-METHYLENE-1-(1-METHYLETHYL)	6.16302	+
6,9,12-OCTADECATRIENOIC ACID, METHYL ESTER	4.37376	+
1,2:4,5-DI-O-ISOPROPYLIDENE-8-TETRADECYNE-D-GLYCERO-D-MANNO-1,2,3,4,5,6-HEXOL	4.37376	+
5,8,11,14-EICOSATETRAENOIC ACID, METHYL ESTER, (ALL-Z)	4.17495	+
4H-1-BENZOPYRAN-4-ONE, 2-(3,4-DIMETHOXYPHENYL)-3,5-DIHYDROXY-7-METHOXY	4.17495	+
3-(HYDROXYMETHYL)-1-PHENYL-1-HEPTADECYN-3-OL	4.17495	+
3,6,9,12-TETRAOXATETRADECAN-1-OL, 14-[4-(1,1,3,3-TETRAMETHYLBUTYL)PHENOXY]	4.17495	+
OXIRANECARBOXAMIDE, 2-ETHYL-3-PROPYL	3.77734	+
TRICYCLO[4.3.1.1(3,8)]UNDECANE-1-CARBOXYLIC ACID	4.37376	+
8-CYCLOHEXADECEN-1-ONE	7.35586	+
PENTADECANOIC ACID, 14-METHYL-, METHYL ESTER	5.5666	+
PREGNANE-3,11,20,21-TETROL, CYCLIC 20,21-(BUTYL BORONATE), (3α,5β,11β,20R)	4.37376	+
06dKasza17%_0kPa
Nazwa
PROPANE, 1-(ETHENYLOXY)-2-METHYL	31.4465	+
4-(BENZOYLOXY)-2H-PYRAN-3-ONE	12.8931	+
2-THIOPHENEETHANOL, 5-(4,5-DIHYDRO-4,4-DIMETHYL-2-OXAZOLYL)	5.34591	+
BICYCLO[3.1.0] HEXANE, 4-METHYLENE-1-(1-METHYLETHYL)	5.34591	+
6,6-DIMETHYL-2-METHYLENE-BICYCLO[3.1.1] HEPTANE	6.91824	+
6,9,12-OCTADECATRIENOIC ACID, METHYL ESTER	4.08805	+
1,2:4,5-DI-O-ISOPROPYLIDENE-8-TETRADECYNE-D-GLYCERO-D-MANNO-1,2,3,4,5,6-HEXOL	4.40252	+
OXIRANECARBOXAMIDE, 2-ETHYL-3-PROPYL	3.77358	+
9H-PYRROLO[3',4':3,4]PYRROLO[2,1-A] PHTHALAZINE-9,11(10H)-DIONE,10-ETHYL-8-PHENYL	4.08805	+
GUANIDINE, N''-[3,5-BIS(TRIFLUOROMETHYL)PHENYL]-N,N,N',N'-TETRAMETHYL	4.08805	+
2,7-DIPHENYL-1,6-DIOXOPYRIDAZINO[4,5-2',3]PYRROLO[4',5'-D] PYRIDAZINE	3.77358	+
4H-1-BENZOPYRAN-4-ONE, 2-(3,4-DIMETHOXYPHENYL)-3,5-DIHYDROXY-7-METHOXY	3.45912	+
TRICYCLO[4.3.1.1(3,8)] UNDECANE-3-CARBOXYLIC ACID	4.08805	+
13-HEPTADECYN-1-OL	6.28931	+
06dKasza17%_40kPa
Nazwa
1-PROPENE, 3-(ETHENYLOXY)-	25	+
PROPANE, 1-(ETHENYLOXY)-2-METHYL-	11.25	+
2-THIOPHENEETHANOL, 5-(4,5-DIHYDRO-4,4-DIMETHYL-2-OXAZOLYL)-	5.25	+
L-TYROSINE, 3-CARBOXY-	5	+
BICYCLO[3.1.0]HEXANE, 4-METHYLENE-1-(1-METHYLETHYL)-	4.75	+
1,3,7-OCTATRIENE, 3,7-DIMETHYL-	5.5	+
6,9,12-OCTADECATRIENOIC ACID, METHYL ESTER	3.75	+
2,7-DIPHENYL-1,6-DIOXOPYRIDAZINO[4,5-2',3']PYRROLO[4',5'-D]PYRIDAZINE	4.25	+
9,12,15-OCTADECATRIENOIC ACID, METHYL ESTER, (Z,Z,Z)-	3.75	+
1H-INDOL-2-AMINE, N-HYDROXY-1-METHYL-N-PHENYL-3-[(PHENYLIMINO)METHYL]-,	4	+
5,8,11,14-EICOSATETRAENOIC ACID, METHYL ESTER, (ALL-Z)-	3.5	+
4H-1-BENZOPYRAN-4-ONE, 2-(3,4-DIMETHOXYPHENYL)-3,5-DIHYDROXY-7-METHOXY-	4	+
BENZENEMETHANOL, α-(1-AMINOETHYL)-	3.75	+
TRICYCLO[4.3.1.1(3,8)]UNDECANE-1-CARBOXYLIC ACID	4	+
13-HEPTADECYN-1-OL	7	+
PENTADECANOIC ACID, 14-METHYL-, METHYL ESTER	5.25	+
06dKasza17%_80kPa
Nazwa
2-OCTADEC-1''-ENYLOXY-1,1,2,2-TETRADEUTERO ETHANOL	13.5286	+
2-THIOPHENEETHANOL, 5-(4,5-DIHYDRO-4,4-DIMETHYL-2-OXAZOLYL)-	5.71827	+
L-TYROSINE, 3-CARBOXY	5.5788	+
3,4-PYRIDINEDICARBOXYLIC ACID, 6-(DIETHYLAMINO)-2-METHOXY-, DIMETHYL ESTER	5.29986	+
6,6-DIMETHYL-2-METHYLENE-BICYCLO[3.1.1] HEPTANE	5.71827	+
1,4,8-CYCLOUNDECATRIENE, 2,6,6,9-TETRAMETHYL-, (E,E,E)-	4.32357	+
PREGNANE-3,11,20,21-TETROL, CYCLIC 20,21-(BUTYL BORONATE), (3α,5β,11β,20R)-	3.34728	+
1,2:4,5-DI-O-ISOPROPYLIDENE-8-TETRADECYNE-D-GLYCERO-D-MANNO-1,2,3,4,5,6-HEXOL	4.60251	+
9,12,15-OCTADECATRIENOIC ACID, 2,3-DIHYDROXYPROPYL ESTER, (Z,Z,Z)-	5.16039	+
S-(TERT-BUTYL) {2-[5-HYDROXY-2-PENTENYL]-3-OXOCYCLOPENTYL}ETHANETHIOATE	3.62622	+
9H-PYRROLO[3',4':3,4]PYRROLO[2,1-A]PHTHALAZINE-9,11(10H)-DIONE,10-ETHYL-8-PHENYL	4.32357	+
BENZOFURAN, 7-(2,4-DINITROPHENOXY)-2,3-DIHYDRO-2,2-DIMETHYL-	3.76569	+	furanes
5,8,11,14-EICOSATETRAENOIC ACID, METHYL ESTER, (ALL-Z)-	4.46304	+
4H-1-BENZOPYRAN-4-ONE, 2-(3,4-DIMETHOXYPHENYL)-3,5-DIHYDROXY-7-METHOXY-	4.46304	+
17-HYDROXY-3-OXOANDROST-4-ENE-17-CARBONITRILE	3.76569	+
SPIROST-8-EN-11-ONE, 3-HYDROXY-, (3β,5α,14β,20β,22β,25R)-	4.32357	+
TETRADECANOIC ACID, 12-METHYL-, METHYL ESTER	3.90516	+
13-HEPTADECYN-1-OL	8.22873	+
PENTADECANOIC ACID, 14-METHYL-, METHYL ESTER	5.85774	+

## Sheet: 07dKasza
07dKasza14%_0kPa
Nazwa
1,1-DICYCLOPROPYL-2-(TRANS-2-CYCLOPROPYLVINYL)CYCLOPROPANE	6.95652	+
2-THIOPHENEETHANOL, 5-(4,5-DIHYDRO-4,4-DIMETHYL-2-OXAZOLYL)	3.47826	+
L-TYROSINE, 3-CARBOXY	2.17391	+
BENZENAMINE, N-(10,11-DIHYDRO-5H-DIBENZO[A,D]CYCLOHEPTEN-5-YLIDENE)-, N-OXIDE	1.73913	+
4H-1-BENZOTHIOPYRAN-4-ONE, 3-[(METHYLPHENYL)AMINO]-, 1-OXIDE	1.30435	+
6-AZA-5,7,12,14-TETRATHIAPENTACENE	1.73913	+
PREGN-4-ENE-21-CARBOXYLIC ACID, 7-(ACETYLTHIO)-17-HYDROXY-3-OXO-, τ-LACTONE, (7α,17α)	1.73913	+
3H-CYCLODECA[B]FURAN-2-ONE, 4,9-DIHYDROXY-6-METHYL-3,10-DIMETHYLENE-3A,4,7,8,9,10,11,11A-OCTAHYDRO	1.73913	+
4H-1-BENZOPYRAN-4-ONE,2-(3,4-DIMETHOXYPHENYL)-3,5-DIHYDROXY-7-METHOXY	2.17391	+
9,12,15-OCTADECATRIENOIC ACID, (2-PHENYL-1,3-DIOXOLAN-4-YL) METHYL ESTER	2.17391	+
2,7-DIPHENYL-1,6-DIOXOPYRIDAZINO[4,5-2',3]PYRROLO[4',5'-D] PYRIDAZINE	2.6087	+
CYCLOPENTANETRIDECANOIC ACID, METHYL ESTER	3.47826	+
9-HEXADECENOIC ACID, METHYL ESTER, (Z)	2.6087	+
9-HEXADECENOIC ACID	43.4783	+
HEXADECANOIC ACID, METHYL ESTER	19.1304	+
PENTADECANOIC ACID	3.47826	+
07dKasza14%_40kPa
Nazwa
2-OCTADEC-1''-ENYLOXY-1,1,2,2-TETRADEUTERO ETHANOL	21.3675	+
2-THIOPHENEETHANOL, 5-(4,5-DIHYDRO-4,4-DIMETHYL-2-OXAZOLYL)	7.05128	+
L-TYROSINE, 3-CARBOXY	6.41026	+
1,3,7-OCTATRIENE, 3,7-DIMETHYL-,	5.98291	+
1,4,8-CYCLOUNDECATRIENE, 2,6,6,9-TETRAMETHYL-, (E,E,E)-	5.55556	+
6,9,12-OCTADECATRIENOIC ACID, METHYL ESTER	4.91453	+
6-AZA-5,7,12,14-TETRATHIAPENTACENE	5.76923	+
3H-CYCLODECA[B]FURAN-2-ONE, 4,9-DIHYDROXY-6-METHYL-3,10-DIMETHYLENE-3A,4,7,8,9,10,11,11A-OCTAHYDRO	4.70085	+
3,20-DIOXO-11-α-HYDROXYCONANINE-1,4-DIENE	4.91453	+
4H-1-BENZOPYRAN-4-ONE, 2-(3,4-DIMETHOXYPHENYL)-3,5-DIHYDROXY-7-METHOXY	4.91453	+
9,12,15-OCTADECATRIENOIC ACID, (2-PHENYL-1,3-DIOXOLAN-4-YL)METHYL ESTER	4.70085	+
BENZENEMETHANOL, α-(1-AMINOETHYL)-	4.48718	+
TRICYCLO[4.3.1.1(3,8)] UNDECANE-1-CARBOXYLIC ACID	5.55556	+
13-HEPTADECYN-1-OL	7.47863	+
PENTADECANOIC ACID, 14-METHYL-, METHYL ESTER	6.19658	+
07dKasza14%_80kPa
Nazwa
3,6-OCTADECADIYNOIC ACID, METHYL ESTER	19.305	+
4-(BENZOYLOXY)-2H-PYRAN-3-ONE	14.8649	+
2-THIOPHENEETHANOL, 5-(4,5-DIHYDRO-4,4-DIMETHYL-2-OXAZOLYL)	5.79151	+
BENZYL (6Z,9Z,12Z)-6,9,12-OCTADECATRIENOATE	6.17761	+
6-IMINO-8-(4'-METHYLPHENYL)-2,3,4,6-TETRAHYDRO-PYRIDO[2,1-B][1,3]THIAZINE-7-CARBONITRILE	4.6332	+
BICYCLO[3.1.0] HEXANE, 4-METHYLENE-1-(1-METHYLETHYL)	7.33591	+
6,9,12-OCTADECATRIENOIC ACID, METHYL ESTER	5.01931	+
HI-OLEIC SAFFLOWER OIL	4.2471	+
4H-1-BENZOPYRAN-4-ONE, 2-(3,4-DIMETHOXYPHENYL)-3,5-DIHYDROXY-7-METHOXY	4.05405	+
3-(HYDROXYMETHYL)-1-PHENYL-1-HEPTADECYN-3-OL	4.05405	+
HYDROXY(MESITYL) ACETIC ACID	4.05405	+
CHOLEST-5-EN-3-YL (9Z)-9-OCTADECENOATE	3.66795	+
TRICYCLO[4.3.1.1(3,8)]UNDECANE-1-CARBOXYLIC ACID	4.05405	+
8-CYCLOHEXADECEN-1-ONE	7.52896	+
PENTADECANOIC ACID, 14-METHYL-, METHYL ESTER	5.21236	+
07dKasza17%_0kPa
Nazwa
PROPANE, 1-(ETHENYLOXY)-2-METHYL	22.6757	+
4-(BENZOYLOXY)-2H-PYRAN-3-ONE	14.2857	+
L-TYROSINE, 3-CARBOXY	4.98866	+
BICYCLO[3.1.0] HEXANE, 4-METHYLENE-1-(1-METHYLETHYL)	5.21542	+
1-OCTEN-3-OL	8.61678	+
6,6-DIMETHYL-2-METHYLENE-BICYCLO[3.1.1] HEPTANE	6.57596	+
6,9,12-OCTADECATRIENOIC ACID, METHYL ESTER	4.08163	+
HI-OLEIC SAFFLOWER OIL	2.94785	+
5,8,11-HEPTADECATRIEN-1-OL	3.40136	+
9H-PYRROLO[3',4':3,4]PYRROLO[2,1-A] PHTHALAZINE-9,11(10H)-DIONE,10-ETHYL-8-PHENYL	3.1746	+
GUANIDINE, N''-[3,5-BIS(TRIFLUOROMETHYL)PHENYL]-N,N,N',N'-TETRAMETHYL	3.40136	+
2,4-IMIDAZOLIDINEDIONE, 1-[[(5-NITRO-2-FURANYL)METHYLENE]AMINO]	3.85488	+
4H-1-BENZOPYRAN-4-ONE, 2-(3,4-DIMETHOXYPHENYL)-3,5-DIHYDROXY-7-METHOXY	3.1746	+
TRICYCLO[4.3.1.1(3,8)] UNDECANE-3-CARBOXYLIC ACID	3.62812	+
13-HEPTADECYN-1-OL	5.66893	+
PENTADECANOIC ACID, 14-METHYL-, METHYL ESTER	4.30839	+
07dKasza17%_40kPa
Nazwa
PROPANE, 1-(ETHENYLOXY)-2-METHYL-	25.5754	+
2-OCTADEC-1''-ENYLOXY-1,1,2,2-TETRADEUTERO ETHANOL	13.2992	+
2-THIOPHENEETHANOL, 5-(4,5-DIHYDRO-4,4-DIMETHYL-2-OXAZOLYL)-	4.34783	+
L-TYROSINE, 3-CARBOXY-	4.60358	+
1-OCTEN-3-OL	5.11509	+
1,3,7-OCTATRIENE, 3,7-DIMETHYL-	5.37084	+
6,9,12-OCTADECATRIENOIC ACID, METHYL ESTER	4.09207	+
HI-OLEIC SAFFLOWER OIL	2.8133	+
2,7-DIPHENYL-1,6-DIOXOPYRIDAZINO[4,5-2',3] PYRROLO[4',5'-D] PYRIDAZINE	4.09207	+
9,12,15-OCTADECATRIENOIC ACID, METHYL ESTER, (Z,Z,Z)-	3.06905	+
1H-INDOL-2-AMINE, N-HYDROXY-1-METHYL-N-PHENYL-3-[(PHENYLIMINO)METHYL]-,	3.06905	+
5,8,11,14-EICOSATETRAENOIC ACID, METHYL ESTER, (ALL-Z)-	2.55754	+
4H-1-BENZOPYRAN-4-ONE, 2-(3,4-DIMETHOXYPHENYL)-3,5-DIHYDROXY-7-METHOXY-	3.06905	+
2,4-IMIDAZOLIDINEDIONE, 1-[[(5-NITRO-2-FURANYL)METHYLENE]AMINO]-	3.06905	+
BENZENEMETHANOL, α-(1-AMINOETHYL)-	2.8133	+
TRICYCLO[4.3.1.1(3,8)]UNDECANE-1-CARBOXYLIC ACID	3.06905	+
13-HEPTADECYN-1-OL	5.88235	+
PENTADECANOIC ACID, 14-METHYL-, METHYL ESTER	4.09207	+
07dKasza17%_80kPa
Nazwa
2-OCTADEC-1''-ENYLOXY-1,1,2,2-TETRADEUTERO ETHANOL	17.8571	+
2-THIOPHENEETHANOL, 5-(4,5-DIHYDRO-4,4-DIMETHYL-2-OXAZOLYL)-	5.89286	+
BICYCLO[3.1.0] HEXANE, 4-METHYLENE-1-(1-METHYLETHYL)-	5.89286	+
2-OCTEN-1-OL, (Z)-	6.78571	+
6,6-DIMETHYL-2-METHYLENE-BICYCLO[3.1.1] HEPTANE	7.14286	+
1,4,8-CYCLOUNDECATRIENE, 2,6,6,9-TETRAMETHYL-, (E,E,E)-	5.35714	+
HI-OLEIC SAFFLOWER OIL	4.10714	+
1,2:4,5-DI-O-ISOPROPYLIDENE-8-TETRADECYNE-D-GLYCERO-D-MANNO-1,2,3,4,5,6-HEXOL	5.35714	+
9,12,15-OCTADECATRIENOIC ACID, (2-PHENYL-1,3-DIOXOLAN-4-YL) METHYL ESTER	4.28571	+
9H-PYRROLO[3',4':3,4]PYRROLO[2,1-A]PHTHALAZINE-9,11(10H)-DIONE,10-ETHYL-8-PHENYL	4.46429	+
BENZENEETHANAMINE, 2,5-DIMETHOXY-α,4-DIMETHYL-	3.57143	+
4H-1-BENZOPYRAN-4-ONE, 2-(3,4-DIMETHOXYPHENYL)-6,7-DIHYDROXY-1-METHYL-	3.92857	+
SPIROST-8-EN-11-ONE, 3-HYDROXY-, (3β,5α,14β,20β,22β,25R)-	3.92857	+
TRICYCLO[4.3.1.1(3,8)]UNDECANE-1-CARBOXYLIC ACID	4.28571	+
13-HEPTADECYN-1-OL	7.32143	+
PENTADECANOIC ACID, 14-METHYL,- METHYL ESTER	5.35714	+
Hexadecanoic acid, 14-methyl,- methyl ester	4.46429	+

## Sheet: 08dKasza
08dKasza14%_0kPa
Nazwa
2-PENTADECYL-4,4,5,5-TETRADEUTERO-1,3-DIOXOLANE	10.1322	+
2-THIOPHENEETHANOL, 5-(4,5-DIHYDRO-4,4-DIMETHYL-2-OXAZOLYL)	3.52423	+
L-TYROSINE, 3-CARBOXY	1.76211	+
BENZENAMINE, N-(10,11-DIHYDRO-5H-DIBENZO[A,D]CYCLOHEPTEN-5-YLIDENE)-, N-OXIDE	2.20264	+
BICYCLO[3.1.0]HEXANE, 4-METHYLENE-1-(1-METHYLETHYL)	1.32159	+
6-AZA-5,7,12,14-TETRATHIAPENTACENE	1.76211	+
HI-OLEIC SAFFLOWER OIL	1.32159	+
PREGN-4-ENE-21-CARBOXYLIC ACID, 7-(ACETYLTHIO)-17-HYDROXY-3-OXO-, τ-LACTONE, (7α,17α)	1.76211	+
1,1'-BIPHENYL, 2,5-DIBROMO-4'-METHOXY	1.76211	+
4H-1-BENZOPYRAN-4-ONE, 2-(3,4-DIMETHOXYPHENYL)-3,5-DIHYDROXY-7-METHOXY	1.76211	+
3-(4-CHLOROPHENYL)-4,6-DIMETHOXY-1-(PROP-2'-ENYL) INDOLE-7-CARBALDEHYDE	2.20264	+
CYCLOPENTANETRIDECANOIC ACID, METHYL ESTER	3.52423	+
9-HEXADECENOIC ACID	44.0529	+
HEXADECANOIC ACID, METHYL ESTER	19.8238	+
HEXADECANOIC ACID, 14-METHYL-, METHYL ESTER	3.0837	+
08dKasza14%_40kPa
Nazwa
2-OCTADEC-1''-ENYLOXY-1,1,2,2-TETRADEUTERO ETHANOL	21.0084	+
2-THIOPHENEETHANOL, 5-(4,5-DIHYDRO-4,4-DIMETHYL-2-OXAZOLYL)	6.72269	+
L-TYROSINE, 3-CARBOXY	5.67227	+
1,3,7-OCTATRIENE, 3,7-DIMETHYL-,	6.51261	+
3(5)-(4'-CHLOROPHENYL)-4-NITROSO-5(3)-PHENYLAMINOPYRAZOLE	5.2521	+
1,4,8-CYCLOUNDECATRIENE, 2,6,6,9-TETRAMETHYL-, (E,E,E)-	6.09244	+
6,9,12-OCTADECATRIENOIC ACID, METHYL ESTER	4.41176	+
6-AZA-5,7,12,14-TETRAPENTACENE	5.04202	+
3H-CYCLODECA[B]FURAN-2-ONE, 4,9-DIHYDROXY-6-METHYL-3,10-DIMETHYLENE-3A,4,7,8,9,10,11,11A-OCTAHYDRO	4.20168	+
3,20-DIOXO-11-α-HYDROXYCONANINE-1,4-DIENE	4.20168	+
4H-1-BENZOPYRAN-4-ONE, 2(3,4-DIMETHOXYPHENYL)-3,5-DIHYDROXY-7-METHOXY	4.41176	+
9,12,15-OCTADECATRIENOIC ACID, (2-PHENYL-1,3-DIOXOLAN-4-YL)METHYL ESTER	4.20168	+
BENZYL (6Z,9Z,12Z)-6,9,12-OCTADECATRIENOATE	3.9916	+
TRICYCLO[4.3.1.1(3,8)] UNDECANE-1-CARBOXYLIC ACID	4.41176	+
13-HEPTADECYN-1-OL	7.98319	+
PENTADECANOIC ACID, 14-METHYL-, METHYL ESTER	5.88235	+
08dKasza14%_80kPa
Nazwa
3,6-OCTADECADIYNOIC ACID, METHYL ESTER	17.4825	+
4-(BENZOYLOXY)-2H-PYRAN-3-ONE	14.6853	+
2-THIOPHENEETHANOL, 5-(4,5-DIHYDRO-4,4-DIMETHYL-2-OXAZOLYL)	5.06993	+
L-TYROSINE, 3-CARBOXY	4.72028	+
BENZYL (6Z,9Z,12Z)- 6,9,12-OCTADECATRIENOATE	5.94406	+
6-IMINO-8-(4'-METHYLPHENYL)-2,3,4,6-TETRAHYDRO-PYRIDO[2,1-B][1,3]THIAZINE-7-CARBONITRILE	4.54545	+
BICYCLO[3.1.0] HEXANE, 4-METHYLENE-1-(1-METHYLETHYL)	6.81818	+
6,9,12-OCTADECATRIENOIC ACID, METHYL ESTER	5.76923	+
HI-OLEIC SAFFLOWER OIL	3.32168	+
4-HYDROXY-4-METHYL-HEX-5-ENOIC ACID TERT-BUTYL ESTER	3.67133	+
4H-1-BENZOPYRAN-4-ONE, 2-(3,4-DIMETHOXYPHENYL)-3,5-DIHYDROXY-7-METHOXY	3.67133	+
CHOLAN-24-OIC ACID, 3,7,12-TRIHYDROXY-, (3α,5β,7α,12α)	2.7972	+
3-(HYDROXYMETHYL)-1-PHENYL-1-HEPTADECYN-3-OL	3.4965	+
3,6,9,12-TETRAOXATETRADECAN-1-OL, 14-[4-(1,1,3,3-TETRAMETHYLBUTYL)PHENOXY]	3.14685	+
TRICYCLO[4.3.1.1(3,8)]UNDECANE-1-CARBOXYLIC ACID	3.67133	+
8-CYCLOHEXADECEN-1-ONE	6.64336	+
PENTADECANOIC ACID, 14-METHYL-, METHYL ESTER	4.54545	+
08dKasza17%_0kPa
Nazwa
PROPANE, 1-(ETHENYLOXY)-2-METHYL	17.9191	+
4-(BENZOYLOXY)-2H-PYRAN-3-ONE	16.3776	+
L-TYROSINE, 3-CARBOXY	5.39499	+
BICYCLO[3.1.0] HEXANE, 4-METHYLENE-1-(1-METHYLETHYL)	5.97303	+
6,6-DIMETHYL-2-METHYLENE-BICYCLO[3.1.1] HEPTANE	6.93642	+
6,9,12-OCTADECATRIENOIC ACID, METHYL ESTER	5.58767	+
3,6-OCTADECADIYNOIC ACID, METHYL ESTER	3.27553	+
1,2:4,5-DI-O-ISOPROPYLIDENE-8-TETRADECYNE-D-GLYCERO-D-MANNO-1,2,3,4,5,6-HEXOL	4.4316	+
OXIRANECARBOXAMIDE, 2-ETHYL-3-PROPYL	3.46821	+
9H-PYRROLO[3',4':3,4]PYRROLO[2,1-A] PHTAHALAZINE-9,11 (10H)-DIONE,10-ETHYL-8-PHENYL	3.46821	+
OXACYCLOTETRADECA-4,11-DIYNE	2.6975	+
GUANIDINE, N''-[3,5-BIS(TRIFLUOROMETHYL)PHENYL]-N,N,N',N'-TETRAMETHYL	3.27553	+
2,7-DIPHENYL-1,6-DIOXOPYRIDAZINO[4,5-2',3]PYRROLO[4',5'-D]PYRIDAZINE	3.08285	+
4H-1-BENZOPYRAN-4-ONE, 2-(3,4-DIMETHOXYPHENYL)-3,5-DIHYDROXY-7-METHOXY	3.08285	+
TRICYCLO[4.3.1.1(3,8)] UNDECANE-1-CARBOXYLIC ACID	3.46821	+
13-HEPTADECYN-1-OL	6.74374	+
PENTADECANOIC ACID, 14-METHYL-, METHYL ESTER	4.81696	+
08dKasza17%_40kPa
Nazwa
PROPANE, 1-(ETHENYLOXY)-2-METHYL-	17.3913	+
2-OCTADEC-1''-ENYLOXY-1,1,2,2-TETRADEUTERO ETHANOL	16.5217	+
2-THIOPHENEETHANOL, 5-(4,5-DIHYDRO-4,4-DIMETHYL-2-OXAZOLYL)-	5.21739	+
BICYCLO[3.1.0]HEXANE, 4-METHYLENE-1-(1-METHYLETHYL)-	5.3913	+
1-OCTEN-3-OL	8.69565	+
1,3,7-OCTATRIENE, 3,7-DIMETHYL-,	6.26087	+
6,9,12-OCTADECATRIENOIC ACID, METHYL ESTER	5.21739	+
HI-OLEIC SAFFLOWER OIL	2.95652	+
4-HYDROXY-4-METHYL-HEX-5-ENOIC ACID TERT-BUTYL ESTER	3.13043	+
1H-INDOL-2-AMINE, N-HYDROXY-1-METHYL-N-PHENYL-3-[(PHENYLIMINO)METHYL]-,	3.30435	+
OXIRANECARBOXAMIDE, 2-ETHYL-3-PROPYL-	2.78261	+
4H-1-BENZOPYRAN-4-ONE, 2-(3,4-DIMETHOXYPHENYL)-3,5-DIHYDROXY-7-METHOXY-	3.30435	+
BENZENEMETHANOL, α-(1-AMINOETHYL)-	3.13043	+
1H-ISOINDOLE-1,3(2H)-DITHIONE, 2-ETHYL-	2.95652	+
TRICYCLO[4.3.1.1(3,8)]UNDECANE-1-CARBOXYLIC ACID	3.47826	+
13-HEPTADECYN-1-OL	5.91304	+
PENTADECANOIC ACID, 14-METHYL-, METHYL ESTER	4.34783	+
08dKasza17%_80kPa
Nazwa
2-OCTADEC-1''-ENYLOXY-1,1,2,2-TETRADEUTERO ETHANOL	19.6464	+
L-TYROSINE, 3-CARBOXY	6.09037	+
BICYCLO[3.1.0] HEXANE, 4-METHYLENE-1-(1-METHYLETHYL)-	6.87623	+
2-OCTEN-1-OL, (Z)-	7.26916	+
6,6-DIMETHYL-2-METHYLENE-BICYCLO[3.1.1] HEPTANE	7.26916	+
1,4,8-CYCLOUNDECATRIENE, 2,6,6,9-TETRAMETHYL-, (E,E,E)-	6.87623	+
HI-OLEIC SAFFLOWER OIL	3.92927	+
1,2:4,5-DI-O-ISOPROPYLIDENE-8-TETRADECYNE-D-GLYCERO-D-MANNO-1,2,3,4,5,6-HEXOL	6.28684	+
9,12,15-OCTADECATRIENOIC ACID, (2-PHENYL-1,3-DIOXOLAN-4-YL) METHYL ESTER	3.92927	+
9H-PYRROLO[3',4':3,4]PYRROLO[2,1-A]PHTHALAZINE-9,11(10H)-DIONE,10-ETHYL-8-PHENYL	4.12574	+
4H-1-BENZOPYRAN-4-ONE, 2-(3,4-DIMETHOXYPHENYL)-3,5-DIHYDROXY-7-METHOXY-	3.92927	+
SPIROST-8-EN-11-ONE, 3-HYDROXY-, (3β,5α,14β,20β,22β,25R)-	3.73281	+
TETRADECANOIC ACID, 12-METHYL-, METHYL ESTER	3.53635	+
TRICYCLO[4.3.1.1(3,8)]UNDECANE-1-CARBOXYLIC ACID	4.12574	+
13-HEPTADECYN-1-OL	7.07269	+
PENTADECANOIC ACID, 14-METHYL,- METHYL ESTER	5.30452	+

## Sheet: 09dKasza
09dKasza14%_0kPa
Nazwa
PROPANE, 1-(ETHENYLOXY)-2-METHYL	52.6316	+
4-(BENZOYLOXY)-2H-PYRAN-3-ONE	10.5263	+
2-THIOPHENEETHANOL, 5-(4,5-DIHYDRO-4,4-DIMETHYL-2-OXAZOLYL)	3.68421	+
L-TYROSINE, 3-CARBOXY	3.68421	+
BICYCLO[3.1.0] HEXANE, 4-METHYLENE-1-(1-METHYLETHYL)	3.15789	+
6,6-DIMETHYL-2-METHYLENE-BICYCLO[3.1.1] HEPTANE	3.68421	+
6,9,12-OCTADECATRIENOIC ACID, METHYL ESTER	3.15789	+
6-AZA-5,7,12,14-TETRATHIAPENTACENE	2.63158	+
9-OCTADECEN-12-YNOIC ACID, METHYL ESTER	2.63158	+
3-BROMO-5-METHYL-1-ADAMANTANECARBOXYLIC ACID	1.57895	+
GUANIDINE, N''-[3,5-BIS(TRIFLUOROMETHYL)PHENYL]-N,N,N',N'-TETRAMETHYL	2.10526	+
SPIROST-8-EN-11-ONE, 3-HYDROXY-, (3β,5α,14β,20β,22β,25R)	1.57895	+
1-ISOTHIOCYANATO-3-METHYLADAMANTANE	2.10526	+
9-HEXADECENOIC ACID	4.21053	+
HEXADECANOIC ACID, METHYL ESTER	2.63158	+
09dKasza14%_40kPa
Nazwa
DICHLOROMETHYL ETHYL SULFONE	46.5116	+
2-OCTADEC-1''-ENYLOXY-1,1,2,2-TETRADEUTERO ETHANOL	13.0233	+
2-THIOPHENEETHANOL, 5-(4,5-DIHYDRO-4,4-DIMETHYL-2-OXAZOLYL)	4.18605	+
1,3,7-OCTATRIENE, 3,7-DIMETHYL-	5.5814	+
3(5)-(4'-CHLOROPHENYL)-4-NITROSO-5(3)-PHENYLAMINOPYRAZOLE	3.25581	+
BICYCLO[3.1.0]HEXANE, 4-METHYLENE-1-(1-METHYLETHYL)	6.04651	+
1,4,8-CYCLOUNDECATRIENE, 2,6,6,9-TETRAMETHYL-, (E,E,E)-	4.18605	+
TETRADECANE, 1-CHLORO-	3.25581	+
3,20-DIOXO-11-α-HYDROXYCONANINE-1,4-DIENE	2.7907	+
4H-1-BENZOPYRAN-4-ONE, 2-(3,4-DIMETHOXYPHENYL)-3,5-DIHYDROXY-7-METHOXY	2.7907	+
TRICYCLO[4.3.1.1(3,8)] UNDECANE-1-CARBOXYLIC ACID	2.7907	+
13-HEPTADECYN-1-OL	5.5814	+
09dKasza14%_80kPa
Nazwa
DICHLOROMETHYL ETHYL SULFONE	52.9101	+
4-(BENZOYLOXY)-2H-PYRAN-3-ONE	12.6984	+
2-THIOPHENEETHANOL, 5-(4,5-DIHYDRO-4,4-DIMETHYL-2-OXAZOLYL)	3.7037	+
BENZYL (6Z,9Z,12Z)- 6,9,12-OCTADECATRIENOATE	4.2328	+
BICYCLO[3.1.0] HEXANE, 4-METHYLENE-1-(1-METHYLETHYL)	4.7619	+
6,9,12-OCTADECATRIENOIC ACID, METHYL ESTER	3.1746	+
4-HYDROXY-4-METHYL-HEX-5-ENOIC ACID TERT-BUTYL ESTER	2.1164	+
4H-1-BENZOPYRAN-4-ONE, 2-(3,4-DIMETHOXYPHENYL)-3,5-DIHYDROXY-7-METHOXY	2.1164	+
3-(HYDROXYMETHYL)-1-PHENYL-1-HEPTADECYN-3-OL	2.1164	+
3,6,9,12-TETRAOXATETRADECAN-1-OL, 14-[4-(1,1,3,3-TETRAMETHYLBUTYL)PHENOXY]	2.1164	+
TRICYCLO[4.3.1.1(3,8)] UNDECANE-1-CABROXYLIC ACID	2.1164	+
8-CYCLOHEXADECEN-1-ONE	4.7619	+
PENTADECANOIC ACID, 14-METHYL-, METHYL ESTER	3.1746	+
09dKasza17%_0kPa
Nazwa
DICHLOROMETHYL ETHYL SULFONE	15.6118	+
4-(BENZOYLOXY)-2H-PYRAN-3-ONE	15.4008	+
2-THIOPHENEETHANOL, 5-(4,5-DIHYDRO-4,4-DIMETHYL-2-OXAZOLYL)-	4.43038	+
L-TYROSINE, 3-CARBOXY	4.64135	+
BICYCLO[3.1.0] HEXANE, 4-METHYLENE-1-(1-METHYLETHYL)-	4.43038	+
1-OCTEN-3-OL	21.097	+
6,6-DIMETHYL-2-METHYLENE-BICYCLO[3.1.1] HEPTANE	5.27426	+
6,9,12-OCTADECATRIENOIC ACID, METHYL ESTER	3.37553	+
OXIRANECARBOXAMIDE, 2-ETHYL-3-PROPYL	2.95359	+
9H-PYRROLO[3',4':3,4]PYRROLO[2,1-A]PHTHALAZINE-9,11(10H)-DIONE,10-ETHYL-8-PHENYL	2.53165	+
5,8,11,14-EICOSATETRAENOIC ACID, METHYL ESTER, (ALL-Z)-	2.1097	+
GUANIDINE, N''-[3,5-BIS(TRIFLUOROMETHYL)PHENYL]-N,N,N',N'-TETRAMETHYL-	2.53165	+
2,7-DIPHENYL-1,6-DIOXOPYRIDAZINO[4,5-2',3]PYRROLO[4',5'-D] PYRIDAZINE	2.32068	+
BENZENEETHANAMINE, 2,5-DIMETHOXY-α-4-DIMETHYL-	2.32068	+
TRICYCLO[4.3.1.1(3,8)] UNDECANE-1-CARBOXYLIC ACID	2.53165	+
13-HEPTADECYN-1-OL	5.06329	+
PENTADECANOIC ACID, 14-METHYL-, METHYL ESTER	3.37553	+
09dKasza17%_40kPa
Nazwa
DICHLOROMETHYL ETHYL SULFONE	40.6504	+
2-OCTADEC-1''-ENYLOXY-1,1,2,2-TETRADEUTERO ETHANOL	13.4146	+
L-TYROSINE, 3-CARBOXY-	3.65854	+
BICYCLO[3.1.0]HEXANE, 4-METHYLENE-1-(1-METHYLETHYL)-	3.65854	+
1-OCTEN-3-OL	7.31707	+
1,3,7-OCTATRIENE, 3,7-DIMETHYL-	4.06504	+
6,9,12-OCTADECATRIENOIC ACID, METHYL ESTER	2.84553	+
4-HYDROXY-4-METHYL-HEX-5-ENOIC ACID TERT-BUTYL ESTER	2.84553	+
1H-INDOL-2-AMINE, N-HYDROXY-1-METHYL-N-PHENYL-3-[(PHENYLIMINO)METHYL]-,	2.43902	+
5,8,11,14-EICOSATETRAENOIC ACID, METHYL ESTER, (ALL-Z)-	2.03252	+
4H-1-BENZOPYRAN-4-ONE, 2-(3,4-DIMETHOXYPHENYL)-3,5-DIHYDROXY-7-METHOXY-	2.43902	+
BENZENEMETHANOL, α-(1-AMINOETHYL)-	2.03252	+
1H-ISOINDOLE-1,3(2H)-DITHIONE, 2-ETHYL-	2.03252	+
TRICYCLO[4.3.1.1(3,8)]UNDECANE-1-CARBOXYLIC ACID	2.43902	+
13-HEPTADECYN-1-OL	4.87805	+
PENTADECANOIC ACID, 14-METHYL-, METHYL ESTER	3.25203	+
09dKasza17%_80kPa
Nazwa
DICHLOROMETHYL ETHYL SULFONE	12.3967	+
2-OCTADEC-1''-ENYLOXY-1,1,2,2-TETRADEUTERO ETHANOL	9.09091	+
2-THIOPHENEETHANOL, 5-(4,5-DIHYDRO-4,4-DIMETHYL-2-OXAZOLYL)-	2.89256	+
L-TYROSINE, 3-CARBOXY	2.06612	+
2-OCTEN-1-OL, (Z)-	1.65289	+
6,6-DIMETHYL-2-METHYLENE-BICYCLO[3.1.1] HEPTANE	1.23967	+
9,12,15-OCTADECATRIENOIC ACID, (2-PHENYL-1,3-DIOXOLAN-4-YL) METHYL ESTER	1.23967	+
9H-PYRROLO[3',4':3,4]PYRROLO[2,1-A]PHTHALAZINE-9,11(10H)-DIONE,10-ETHYL-8-PHENYL	1.23967	+
4H-1-BENZOPYRAN-4-ONE, 2-(3,4-DIMETHOXYPHENYL)-3,5-DIHYDROXY-7-METHOXY-	1.65289	+
2,7-DIPHENYL-1,6-DIOXOPYRIDAZINO[4,5-2',3']PYRROLO[4',5'-D]PYRIDAZINE	1.65289	+
TETRADECANOIC ACID, 12-METHYL-, METHYL ESTER	2.89256	+
13-HEPTADECYN-1-OL	41.3223	+
PENTADECANOIC ACID, 14-METHYL,- METHYL ESTER	18.595	+
HEXADECANOIC ACID, 14-METHYL-, METHYL ESTER	2.06612	+
