# Supplementary material for: Application of MOX Sensors to Determine the Emission of Volatile Compounds in Corn Groats as a Function of Vertical Pressure in the Silo and Moisture Content of the Bed
Source: Sensors (Basel). 2024 Mar 28;24(7):2187. doi: 10.3390/s24072187 (PMC11014101; doi:10.3390/s24072187)
Supplement: Supplementary file 1 [file sensors-24-02187-s001.zip › 03_Supplementary_materials_An_electornic_nose_results.xlsx]

## Sheet: Arkusz1
Days	2602	AMS-MLV-P2	2603	2612	2610	2611	2620	2600
01d 14% 0kPa	0.7288	0.308063	0.0542657	0.000909328	0.286914	0.259555	0.604915	0.554127
02d 14% 0kPa	0.899764	0.324005	0.064477	-0.000849366	0.308328	0.287431	0.651886	0.599136
03d 14% 0 kPa	0.758242	0.262785	0.0447383	0.00787282	0.313667	0.284038	0.659473	0.594854
04d 14% 0 kPa	0.74024	0.236794	0.0453069	0.0259807	0.337742	0.303439	0.718454	0.632895
05d 14% 0kPa	0.697297	0.199425	0.0380925	0.00216711	0.279819	0.25224	0.586646	0.534604
06d 14% 0kPa	0.757477	0.227662	0.0339025	0.00312984	0.301736	0.262884	0.647273	0.58754
07d 14% 0kPa	0.667051	0.191058	0.0226085	0.00205016	0.259042	0.227338	0.582858	0.51477
08d 14% 0kPa	0.657712	0.151505	0.0291848	0.000760198	0.252642	0.231306	0.550649	0.49088
09d 14% 0kPa	0.502605	0.137827	0.0141919	0.00190222	0.182365	0.160487	0.413642	0.364223
01d 14% 40kPa	0.94028	0.35932	0.0696701	5.71012e-05	0.36899	0.33815	0.774187	0.709407
02d 14% 40 kPa	1.02107	0.337351	0.0698962	-0.0213975	0.356664	0.333816	0.750597	0.691754
03d 14% 40 kPa	0.930536	0.303507	0.0647476	0.010108	0.38679	0.353082	0.807928	0.734736
04d 14% 40 kPa	0.915203	0.295363	0.0668206	0.0336685	0.418437	0.381246	0.879728	0.794148
05d 14% 40kPa	0.925053	0.250739	0.0552443	0.0050782	0.36592	0.333534	0.769197	0.696904
06d 14% 40kPa	0.962433	0.277452	0.0487739	0.0072521	0.385559	0.34184	0.820148	0.752405
07d 14% 40kPa	0.925518	0.246017	0.0355606	0.006387	0.354559	0.314643	0.789582	0.707131
08d 14% 40kPa	0.835831	0.183525	0.0364983	-0.00622427	0.312295	0.286878	0.693854	0.620852
09d 14% 40kPa	0.819889	0.205491	0.0260639	0.0064882	0.291069	0.258472	0.658271	0.592214
01d 14% 80kPa	0.887219	0.30373	0.0695628	-0.0103201	0.356378	0.324734	0.746195	0.685242
02d 14% 80 kPa	0.928664	0.278042	0.0547698	-0.0528771	0.334374	0.310253	0.704312	0.648143
03d 14% 80 kPa	0.87639	0.269076	0.0619164	0.01753	0.367701	0.332906	0.770626	0.699293
04d 14% 80 kPa	0.809686	0.227696	0.0592592	0.038996	0.365431	0.326553	0.770717	0.67184
05d 14% 80kPa	0.842556	0.212396	0.0517002	0.0140976	0.344865	0.312504	0.718795	0.657387
06d 14% 80kPa	0.877552	0.23041	0.0469118	0.0141841	0.359238	0.315642	0.761856	0.699526
07d 14% 80kPa	0.83459	0.204002	0.0361769	0.0109766	0.330881	0.291558	0.735103	0.649846
08d 14% 80kPa	0.704881	0.13866	0.0283587	-0.00933683	0.268531	0.244134	0.599969	0.537057
09d 14% 80kPa	0.719025	0.168769	0.0250518	0.0083586	0.264204	0.23312	0.594436	0.527436
01d 17% 0kPa	1.29767	0.495391	0.127134	0.00391507	0.58034	0.566035	1.16651	1.0881
02d 17% 0 kPa	1.50905	0.549514	0.131462	0.00554883	0.625498	0.624103	1.27001	1.18153
03d 17% 0 kPa	1.23838	0.450595	0.116425	0.0328925	0.614075	0.593262	1.23907	1.11776
04d 17% 0 kPa	1.20229	0.409566	0.121897	0.0538685	0.637046	0.610331	1.28992	1.16498
05d 17% 0kPa	0.761565	0.244372	0.0566524	0.0324095	0.387139	0.370228	0.771248	0.702694
06d 17% 0kPa	0.567269	0.161406	0.0275004	0.0460548	0.25581	0.242405	0.525167	0.467553
07d 17% 0kPa	0.682308	0.122797	0.0207022	0.0370215	0.22669	0.220615	0.472707	0.411029
08d 17% 0kPa	0.701532	0.0942824	0.0163678	0.0263493	0.194702	0.198055	0.395275	0.341367
09d 17% 0kPa	0.690813	0.0881362	0.0140488	0.0285062	0.183375	0.179715	0.390229	0.346425
01d 17% 40kPa	1.12009	0.392307	0.100836	0.000890732	0.479568	0.454927	0.978387	0.907769
02d 17% 40 kPa	1.2871	0.422202	0.0964396	0.0019654	0.519055	0.504192	1.06872	0.988368
03d 17% 40 kPa	1.07474	0.368413	0.0905194	0.0279143	0.519474	0.4919	1.06752	0.979267
04d 17% 40 kPa	1.01754	0.333631	0.0932183	0.0583842	0.530549	0.496512	1.09214	0.979181
05d 17% 40kPa	0.868706	0.271059	0.0622553	0.018375	0.424711	0.401858	0.860055	0.787752
06d 17% 40kPa	0.42368	0.142801	0.0203907	0.0224323	0.220505	0.202137	0.458104	0.401445
07d 17% 40kPa	0.344631	0.0946398	0.0132731	0.0185798	0.160462	0.159882	0.334668	0.29211
08d 17% 40kPa	0.29563	0.0759408	0.0110488	0.00801051	0.128942	0.135478	0.259782	0.218159
09d 17% 40kPa	0.314771	0.0710213	0.0102556	0.021772	0.117911	0.120443	0.244374	0.214906
01d 17% 80kPa	1.16095	0.392562	0.106013	-0.00144815	0.495902	0.470376	1.00877	0.930987
02d 17% 80 kPa	1.27328	0.429548	0.0884621	0.00300324	0.516352	0.497306	1.07105	0.991481
03d 17% 80 kPa	1.10381	0.368163	0.0982347	0.0364699	0.543438	0.514757	1.10788	1.0244
04d 17% 80 kPa	1.06946	0.330111	0.096065	0.0606027	0.557347	0.523501	1.14089	1.04214
05d 17% 80kPa	0.929368	0.273108	0.0679296	0.0185884	0.446907	0.422737	0.907995	0.833236
06d 17% 80kPa	0.464151	0.149298	0.0210106	0.0251813	0.239171	0.21726	0.497233	0.440967
07d 17% 80kPa	0.371283	0.0963516	0.0135175	0.0286649	0.167737	0.165381	0.346233	0.302828
08d 17% 80kPa	0.358562	0.085021	0.0126379	0.0223764	0.147523	0.152912	0.297425	0.255014
09d 17% 80kPa	0.363161	0.0771773	0.0113082	0.0300213	0.128677	0.130373	0.267964	0.236176
